# Supplementary material for: Host Adaptation and Evolutionary Analysis of Zaire ebolavirus: Insights From Codon Usage Based Investigations
Source: Front Microbiol. 2020 Nov 5;11:570131. doi: 10.3389/fmicb.2020.570131 (PMC7674656; doi:10.3389/fmicb.2020.570131)
Supplement: Supplementary Table 1 — Information regarding the accession numbers, variant names, subtypes, compositional features, RSCU values, CAI values, and RCDI values of EBOV considered in the present analysis. The accession numbers for the genomic sequences of the potential host species that were used in the analysis have also been provided. The potential hosts that dwell in Africa are marked in red. [file Table_1.XLSX]

## Sheet: results
Accession	Region	Country	Year of isolation	Outbreaks	U3s	C3s	A3s	G3s	ENC	GC1	GC2	GC3	AU	GC	U_Overall	C_Overall	A_Overall	G_Overall	Axis1(RSCU)	Axis2(RSCU)	UUU	UUC	UUA	UUG	CUU	CUC	CUA	CUG	AUU	AUC	AUA	AUG	GUU	GUC	GUA	GUG	UCU	UCC	UCA	UCG	CCU	CCC	CCA	CCG	ACU	ACC	ACA	ACG	GCU
KU296371	West Africa	Sierra Leone	2015	2014-2016|West African Epidemic	0.3734	0.254	0.3975	0.2353	55.61	0.519	0.404	0.38	0.565	0.435	0.255	0.232	0.311	0.203	0.00681	0.00333	1.02	0.98	1.32	1.08	1.14	0.64	0.88	0.94	1.44	0.91	0.65	1	1.47	0.83	0.91	0.78	0.87	0.74	1.8	0.4	1.15	0.68	1.55	0.62	1.11	0.84	1.54	0.5	1.37
KU296440	West Africa	Sierra Leone	2015	2014-2016|West African Epidemic	0.3731	0.254	0.3977	0.2352	55.61	0.519	0.404	0.38	0.564	0.436	0.255	0.232	0.311	0.203	0.00681	0.0031	1.02	0.98	1.32	1.07	1.15	0.64	0.88	0.94	1.43	0.91	0.66	1	1.47	0.83	0.91	0.78	0.87	0.74	1.8	0.4	1.15	0.68	1.55	0.62	1.11	0.84	1.55	0.5	1.37
KU296399	West Africa	Sierra Leone	2015	2014-2016|West African Epidemic	0.373	0.2541	0.3978	0.2352	55.61	0.519	0.405	0.38	0.564	0.436	0.255	0.232	0.311	0.203	0.00683	0.00353	1.02	0.98	1.32	1.07	1.15	0.64	0.88	0.94	1.43	0.91	0.66	1	1.47	0.83	0.91	0.78	0.87	0.74	1.8	0.4	1.15	0.68	1.55	0.62	1.1	0.84	1.56	0.5	1.37
KU296504	West Africa	Sierra Leone	2015	2014-2016|West African Epidemic	0.373	0.2541	0.3978	0.2352	55.61	0.519	0.405	0.38	0.564	0.436	0.255	0.232	0.311	0.203	0.00683	0.00353	1.02	0.98	1.32	1.07	1.15	0.64	0.88	0.94	1.43	0.91	0.66	1	1.47	0.83	0.91	0.78	0.87	0.74	1.8	0.4	1.15	0.68	1.55	0.62	1.1	0.84	1.56	0.5	1.37
KU296732	West Africa	Sierra Leone	2015	2014-2016|West African Epidemic	0.373	0.2541	0.3978	0.2352	55.61	0.519	0.405	0.38	0.564	0.436	0.255	0.232	0.311	0.203	0.00683	0.00353	1.02	0.98	1.32	1.07	1.15	0.64	0.88	0.94	1.43	0.91	0.66	1	1.47	0.83	0.91	0.78	0.87	0.74	1.8	0.4	1.15	0.68	1.55	0.62	1.1	0.84	1.56	0.5	1.37
KU296450	West Africa	Sierra Leone	2015	2014-2016|West African Epidemic	0.3732	0.2541	0.3976	0.2352	55.63	0.519	0.405	0.38	0.564	0.436	0.255	0.232	0.311	0.203	0.00635	0.00346	1.02	0.98	1.32	1.07	1.15	0.64	0.88	0.94	1.43	0.91	0.66	1	1.47	0.83	0.91	0.78	0.88	0.74	1.79	0.4	1.15	0.68	1.55	0.62	1.1	0.84	1.56	0.5	1.37
KU296414	West Africa	Sierra Leone	2015	2014-2016|West African Epidemic	0.3728	0.2542	0.3976	0.2351	55.63	0.519	0.405	0.38	0.564	0.436	0.254	0.232	0.311	0.203	0.00684	0.00472	1.02	0.98	1.32	1.07	1.15	0.64	0.88	0.94	1.43	0.91	0.66	1	1.47	0.83	0.91	0.78	0.87	0.74	1.8	0.4	1.15	0.68	1.55	0.62	1.1	0.85	1.55	0.5	1.37
KU296617	West Africa	Sierra Leone	2015	2014-2016|West African Epidemic	0.3731	0.2543	0.3976	0.235	55.61	0.519	0.404	0.38	0.564	0.436	0.254	0.232	0.311	0.203	0.0072	0.00232	1.02	0.98	1.32	1.07	1.15	0.64	0.88	0.94	1.43	0.92	0.65	1	1.47	0.83	0.92	0.78	0.87	0.74	1.8	0.4	1.15	0.69	1.54	0.62	1.11	0.84	1.55	0.5	1.37
KU296428	West Africa	Sierra Leone	2015	2014-2016|West African Epidemic	0.373	0.2542	0.3976	0.2351	55.63	0.519	0.404	0.38	0.564	0.436	0.254	0.232	0.311	0.203	0.00738	0.00304	1.02	0.98	1.32	1.07	1.15	0.64	0.88	0.94	1.43	0.91	0.66	1	1.47	0.83	0.91	0.78	0.87	0.74	1.8	0.4	1.15	0.69	1.54	0.62	1.11	0.84	1.55	0.5	1.37
KU296337	West Africa	Sierra Leone	2015	2014-2016|West African Epidemic	0.3734	0.2538	0.3976	0.2351	55.61	0.519	0.405	0.38	0.564	0.436	0.255	0.232	0.311	0.203	0.0058	0.00271	1.02	0.98	1.32	1.07	1.15	0.64	0.88	0.94	1.43	0.91	0.66	1	1.47	0.83	0.91	0.78	0.87	0.74	1.8	0.4	1.17	0.67	1.55	0.62	1.11	0.84	1.55	0.5	1.37
KU296462	West Africa	Sierra Leone	2015	2014-2016|West African Epidemic	0.3728	0.2542	0.3974	0.2352	55.63	0.52	0.405	0.38	0.564	0.436	0.255	0.232	0.311	0.203	0.00769	0.00531	1.02	0.98	1.32	1.07	1.15	0.64	0.88	0.94	1.42	0.92	0.66	1	1.48	0.82	0.92	0.78	0.87	0.74	1.8	0.4	1.15	0.68	1.55	0.62	1.09	0.86	1.56	0.5	1.37
KT725340	West Africa	Liberia	2014	2014-2016|West African Epidemic	0.3731	0.2545	0.3978	0.2349	55.56	0.519	0.404	0.38	0.565	0.435	0.255	0.232	0.311	0.203	0.00709	-0.00017	1.01	0.99	1.32	1.07	1.15	0.64	0.88	0.94	1.43	0.92	0.65	1	1.47	0.83	0.91	0.78	0.86	0.74	1.81	0.4	1.15	0.69	1.54	0.62	1.11	0.84	1.56	0.49	1.36
KT725284	West Africa	Liberia	2014	2014-2016|West African Epidemic	0.3729	0.2548	0.3973	0.2355	55.66	0.519	0.404	0.381	0.564	0.436	0.255	0.232	0.311	0.203	0.00936	0.00193	1.03	0.97	1.32	1.06	1.15	0.64	0.88	0.94	1.43	0.91	0.66	1	1.47	0.83	0.91	0.78	0.85	0.74	1.8	0.42	1.15	0.7	1.55	0.61	1.1	0.84	1.54	0.52	1.37
KU296382	West Africa	Sierra Leone	2015	2014-2016|West African Epidemic	0.373	0.2546	0.397	0.2358	55.62	0.519	0.404	0.381	0.564	0.436	0.254	0.232	0.311	0.203	0.00743	-0.00022	1.02	0.98	1.32	1.06	1.15	0.64	0.88	0.95	1.44	0.9	0.66	1	1.47	0.83	0.91	0.78	0.84	0.76	1.81	0.4	1.14	0.7	1.55	0.62	1.11	0.84	1.55	0.5	1.36
KU296552	West Africa	Sierra Leone	2015	2014-2016|West African Epidemic	0.3732	0.2543	0.3973	0.2355	55.62	0.519	0.404	0.38	0.564	0.436	0.255	0.232	0.311	0.203	0.00634	-0.00028	1.02	0.98	1.32	1.06	1.15	0.64	0.88	0.95	1.44	0.9	0.66	1	1.47	0.83	0.91	0.78	0.85	0.74	1.81	0.4	1.14	0.7	1.55	0.62	1.11	0.84	1.55	0.5	1.36
KU296624	West Africa	Sierra Leone	2015	2014-2016|West African Epidemic	0.3731	0.2544	0.3974	0.2356	55.62	0.519	0.404	0.38	0.564	0.436	0.255	0.232	0.311	0.203	0.00637	0.00015	1.02	0.98	1.32	1.06	1.15	0.64	0.88	0.95	1.44	0.9	0.66	1	1.47	0.83	0.91	0.78	0.85	0.74	1.81	0.4	1.14	0.7	1.55	0.62	1.1	0.84	1.56	0.5	1.36
KU296305	West Africa	Sierra Leone	2015	2014-2016|West African Epidemic	0.3731	0.2545	0.3972	0.2355	55.63	0.519	0.404	0.381	0.564	0.436	0.254	0.232	0.311	0.203	0.00683	-0.00046	1.02	0.98	1.32	1.06	1.15	0.64	0.88	0.95	1.44	0.9	0.66	1	1.47	0.83	0.91	0.78	0.85	0.74	1.81	0.4	1.13	0.71	1.54	0.62	1.11	0.84	1.55	0.5	1.36
KU296453	West Africa	Sierra Leone	2014	2014-2016|West African Epidemic	0.3728	0.2541	0.3982	0.2353	55.59	0.519	0.404	0.38	0.565	0.435	0.255	0.232	0.311	0.203	0.00711	0.00017	1.02	0.98	1.32	1.07	1.15	0.64	0.88	0.94	1.43	0.91	0.66	1	1.47	0.82	0.91	0.8	0.85	0.74	1.81	0.4	1.14	0.7	1.55	0.62	1.1	0.84	1.56	0.5	1.36
KU296714	West Africa	Sierra Leone	2015	2014-2016|West African Epidemic	0.3731	0.2544	0.3974	0.2356	55.59	0.519	0.404	0.38	0.564	0.436	0.255	0.232	0.311	0.203	0.00766	0.0002	1.02	0.98	1.32	1.07	1.15	0.64	0.88	0.94	1.43	0.91	0.66	1	1.49	0.82	0.91	0.78	0.85	0.74	1.81	0.4	1.14	0.7	1.55	0.62	1.1	0.84	1.56	0.5	1.36
KU296661	West Africa	Sierra Leone	2015	2014-2016|West African Epidemic	0.3732	0.2543	0.3973	0.2355	55.59	0.519	0.404	0.38	0.564	0.436	0.255	0.232	0.311	0.203	0.00763	-0.00023	1.02	0.98	1.32	1.07	1.15	0.64	0.88	0.94	1.43	0.91	0.66	1	1.49	0.82	0.91	0.78	0.85	0.74	1.81	0.4	1.14	0.7	1.55	0.62	1.11	0.84	1.55	0.5	1.36
KU296567	West Africa	Sierra Leone	2015	2014-2016|West African Epidemic	0.3732	0.2543	0.3973	0.2355	55.59	0.519	0.404	0.38	0.564	0.436	0.255	0.232	0.311	0.203	0.00763	-0.00023	1.02	0.98	1.32	1.07	1.15	0.64	0.88	0.94	1.43	0.91	0.66	1	1.49	0.82	0.91	0.78	0.85	0.74	1.81	0.4	1.14	0.7	1.55	0.62	1.11	0.84	1.55	0.5	1.36
KU296782	West Africa	Sierra Leone	2015	2014-2016|West African Epidemic	0.3732	0.2543	0.3973	0.2355	55.59	0.519	0.404	0.38	0.564	0.436	0.255	0.232	0.311	0.203	0.00763	-0.00023	1.02	0.98	1.32	1.07	1.15	0.64	0.88	0.94	1.43	0.91	0.66	1	1.49	0.82	0.91	0.78	0.85	0.74	1.81	0.4	1.14	0.7	1.55	0.62	1.11	0.84	1.55	0.5	1.36
KY366417	West Africa	Sierra Leone	2015	2014-2016|West African Epidemic	0.3731	0.2545	0.3972	0.2355	55.6	0.519	0.404	0.381	0.564	0.436	0.255	0.232	0.311	0.203	0.00812	-0.00041	1.02	0.98	1.32	1.07	1.15	0.64	0.88	0.94	1.43	0.91	0.66	1	1.49	0.82	0.91	0.78	0.85	0.74	1.81	0.4	1.13	0.71	1.54	0.62	1.11	0.84	1.55	0.5	1.36
KU296420	West Africa	Sierra Leone	2015	2014-2016|West African Epidemic	0.3733	0.2539	0.3977	0.2355	55.59	0.519	0.405	0.38	0.564	0.436	0.255	0.231	0.311	0.203	0.00556	0.00101	1.03	0.97	1.32	1.08	1.14	0.64	0.88	0.94	1.44	0.9	0.66	1	1.47	0.84	0.89	0.8	0.85	0.74	1.81	0.4	1.15	0.68	1.55	0.62	1.1	0.84	1.56	0.5	1.36
MF599518	West Africa	Sierra Leone	2015	2014-2016|West African Epidemic	0.3733	0.2542	0.3973	0.2355	55.61	0.519	0.404	0.38	0.564	0.436	0.255	0.232	0.311	0.203	0.00564	0.00059	1.03	0.97	1.32	1.08	1.14	0.64	0.88	0.94	1.44	0.9	0.66	1	1.47	0.84	0.89	0.8	0.85	0.74	1.81	0.4	1.15	0.69	1.54	0.62	1.11	0.84	1.55	0.5	1.36
KU296689	West Africa	Sierra Leone	2015	2014-2016|West African Epidemic	0.3735	0.2541	0.3975	0.2352	55.61	0.519	0.404	0.38	0.564	0.436	0.255	0.232	0.311	0.203	0.0069	-0.00077	1.02	0.98	1.32	1.07	1.15	0.64	0.88	0.94	1.43	0.91	0.66	1	1.47	0.84	0.91	0.78	0.85	0.74	1.8	0.4	1.14	0.7	1.55	0.62	1.11	0.84	1.54	0.5	1.36
KU296452	West Africa	Sierra Leone	2015	2014-2016|West African Epidemic	0.3735	0.2541	0.3976	0.2352	55.6	0.52	0.404	0.38	0.564	0.436	0.255	0.232	0.311	0.203	0.00722	-0.00056	1.02	0.98	1.32	1.07	1.15	0.64	0.88	0.94	1.43	0.91	0.66	1	1.47	0.83	0.91	0.78	0.85	0.74	1.81	0.4	1.14	0.7	1.54	0.62	1.11	0.84	1.54	0.5	1.36
KU296536	West Africa	Sierra Leone	2015	2014-2016|West African Epidemic	0.3732	0.2542	0.3978	0.2354	55.59	0.52	0.404	0.38	0.564	0.436	0.255	0.231	0.311	0.203	0.00779	-0.00014	1.02	0.98	1.32	1.07	1.15	0.64	0.88	0.94	1.43	0.91	0.66	1	1.47	0.83	0.91	0.78	0.84	0.74	1.82	0.4	1.14	0.7	1.54	0.62	1.1	0.85	1.55	0.5	1.36
KU296511	West Africa	Sierra Leone	2015	2014-2016|West African Epidemic	0.3734	0.2542	0.3975	0.2354	55.61	0.519	0.404	0.38	0.565	0.435	0.255	0.231	0.311	0.203	0.00715	-0.00061	1.02	0.98	1.32	1.07	1.15	0.64	0.88	0.94	1.43	0.91	0.66	1	1.47	0.83	0.91	0.78	0.85	0.74	1.81	0.4	1.15	0.7	1.53	0.63	1.11	0.84	1.54	0.5	1.36
KU296800	West Africa	Sierra Leone	2015	2014-2016|West African Epidemic	0.3733	0.2541	0.3975	0.2354	55.6	0.52	0.404	0.38	0.564	0.436	0.255	0.232	0.311	0.203	0.0073	-1e-05	1.02	0.98	1.32	1.07	1.15	0.64	0.88	0.94	1.43	0.91	0.66	1	1.47	0.83	0.91	0.78	0.85	0.74	1.81	0.4	1.14	0.7	1.54	0.62	1.1	0.85	1.55	0.5	1.36
MF599506	West Africa	Sierra Leone	2015	2014-2016|West African Epidemic	0.3734	0.2543	0.3975	0.2352	55.61	0.52	0.404	0.38	0.564	0.436	0.255	0.232	0.311	0.203	0.00771	-0.00074	1.02	0.98	1.32	1.07	1.15	0.64	0.88	0.94	1.43	0.91	0.66	1	1.47	0.83	0.91	0.78	0.85	0.74	1.81	0.4	1.14	0.71	1.53	0.62	1.11	0.84	1.54	0.5	1.36
KU296704	West Africa	Sierra Leone	2015	2014-2016|West African Epidemic	0.3735	0.2541	0.3976	0.2352	55.6	0.519	0.404	0.38	0.565	0.435	0.255	0.232	0.311	0.203	0.0073	-0.00043	1.02	0.98	1.32	1.07	1.15	0.64	0.88	0.94	1.43	0.91	0.66	1	1.47	0.83	0.91	0.78	0.85	0.74	1.81	0.4	1.14	0.7	1.54	0.62	1.11	0.84	1.54	0.5	1.36
KU296307	West Africa	Sierra Leone	2015	2014-2016|West African Epidemic	0.3733	0.2541	0.3977	0.2353	55.6	0.519	0.404	0.38	0.565	0.435	0.255	0.232	0.311	0.203	0.00733	0	1.02	0.98	1.32	1.07	1.15	0.64	0.88	0.94	1.43	0.91	0.66	1	1.47	0.83	0.91	0.78	0.85	0.74	1.81	0.4	1.14	0.7	1.54	0.62	1.1	0.85	1.55	0.5	1.36
KU296542	West Africa	Sierra Leone	2015	2014-2016|West African Epidemic	0.3735	0.2541	0.3976	0.2352	55.6	0.52	0.404	0.38	0.564	0.436	0.255	0.232	0.311	0.203	0.00719	-0.00084	1.02	0.98	1.32	1.07	1.15	0.64	0.88	0.94	1.43	0.91	0.66	1	1.47	0.83	0.91	0.78	0.85	0.74	1.8	0.4	1.14	0.7	1.55	0.62	1.11	0.84	1.54	0.5	1.36
KU296590	West Africa	Sierra Leone	2015	2014-2016|West African Epidemic	0.3733	0.2541	0.3977	0.2353	55.6	0.52	0.404	0.38	0.564	0.436	0.255	0.232	0.311	0.203	0.00722	-0.0004	1.02	0.98	1.32	1.07	1.15	0.64	0.88	0.94	1.43	0.91	0.66	1	1.47	0.83	0.91	0.78	0.85	0.74	1.8	0.4	1.14	0.7	1.55	0.62	1.1	0.85	1.55	0.5	1.36
KU296787	West Africa	Sierra Leone	2015	2014-2016|West African Epidemic	0.373	0.2543	0.3979	0.2355	55.59	0.52	0.404	0.38	0.564	0.436	0.255	0.232	0.311	0.203	0.0076	-0.00067	1.02	0.98	1.32	1.07	1.15	0.64	0.88	0.94	1.43	0.91	0.66	1	1.47	0.83	0.91	0.78	0.84	0.74	1.81	0.4	1.14	0.7	1.55	0.62	1.1	0.85	1.55	0.5	1.36
KU296525	West Africa	Sierra Leone	2015	2014-2016|West African Epidemic	0.3732	0.2542	0.3978	0.2354	55.6	0.52	0.404	0.38	0.564	0.436	0.255	0.232	0.311	0.203	0.00706	-0.00065	1.02	0.98	1.32	1.07	1.15	0.64	0.88	0.94	1.43	0.91	0.66	1	1.47	0.83	0.91	0.78	0.85	0.74	1.8	0.4	1.14	0.7	1.55	0.62	1.1	0.85	1.55	0.5	1.36
KU296594	West Africa	Sierra Leone	2015	2014-2016|West African Epidemic	0.3735	0.2541	0.3977	0.2353	55.59	0.52	0.404	0.38	0.564	0.436	0.255	0.232	0.311	0.203	0.00785	-0.00057	1.02	0.98	1.32	1.07	1.15	0.64	0.88	0.94	1.43	0.91	0.66	1	1.47	0.83	0.91	0.78	0.85	0.74	1.8	0.4	1.14	0.7	1.55	0.62	1.11	0.84	1.54	0.5	1.36
KU296469	West Africa	Sierra Leone	2015	2014-2016|West African Epidemic	0.3735	0.2541	0.3976	0.2352	55.63	0.52	0.404	0.38	0.564	0.436	0.255	0.232	0.311	0.203	0.00729	-0.00043	1.02	0.98	1.32	1.08	1.15	0.63	0.88	0.93	1.43	0.91	0.66	1	1.47	0.83	0.91	0.78	0.85	0.74	1.8	0.4	1.13	0.71	1.54	0.62	1.11	0.84	1.54	0.5	1.36
KU296416	West Africa	Sierra Leone	2015	2014-2016|West African Epidemic	0.3732	0.2543	0.3976	0.2352	55.61	0.519	0.404	0.38	0.564	0.436	0.255	0.232	0.311	0.203	0.00747	-0.00102	1.02	0.98	1.32	1.07	1.15	0.64	0.88	0.94	1.43	0.91	0.66	1	1.47	0.83	0.91	0.78	0.85	0.74	1.8	0.4	1.14	0.7	1.55	0.62	1.11	0.84	1.55	0.5	1.36
KU296409	West Africa	Sierra Leone	2015	2014-2016|West African Epidemic	0.3731	0.2544	0.3977	0.2353	55.61	0.519	0.404	0.38	0.564	0.436	0.255	0.232	0.311	0.203	0.0075	-0.00059	1.02	0.98	1.32	1.07	1.15	0.64	0.88	0.94	1.43	0.91	0.66	1	1.47	0.83	0.91	0.78	0.85	0.74	1.8	0.4	1.14	0.7	1.55	0.62	1.1	0.84	1.56	0.5	1.36
KU296673	West Africa	Sierra Leone	2015	2014-2016|West African Epidemic	0.3733	0.2541	0.3977	0.2353	55.61	0.519	0.404	0.38	0.564	0.436	0.255	0.232	0.311	0.203	0.0073	-0.00028	1.02	0.98	1.32	1.07	1.15	0.64	0.88	0.94	1.43	0.91	0.66	1	1.47	0.83	0.91	0.78	0.85	0.74	1.8	0.4	1.14	0.7	1.55	0.62	1.1	0.85	1.55	0.5	1.36
KU296765	West Africa	Sierra Leone	2015	2014-2016|West African Epidemic	0.3733	0.2541	0.3977	0.2353	55.61	0.519	0.404	0.38	0.564	0.436	0.255	0.232	0.311	0.203	0.0073	-0.00028	1.02	0.98	1.32	1.07	1.15	0.64	0.88	0.94	1.43	0.91	0.66	1	1.47	0.83	0.91	0.78	0.85	0.74	1.8	0.4	1.14	0.7	1.55	0.62	1.1	0.85	1.55	0.5	1.36
KU296388	West Africa	Sierra Leone	2015	2014-2016|West African Epidemic	0.3735	0.2541	0.3976	0.2352	55.61	0.519	0.404	0.38	0.564	0.436	0.255	0.232	0.311	0.203	0.00727	-0.00071	1.02	0.98	1.32	1.07	1.15	0.64	0.88	0.94	1.43	0.91	0.66	1	1.47	0.83	0.91	0.78	0.85	0.74	1.8	0.4	1.14	0.7	1.55	0.62	1.11	0.84	1.54	0.5	1.36
KU296303	West Africa	Sierra Leone	2015	2014-2016|West African Epidemic	0.3731	0.2544	0.398	0.235	55.57	0.519	0.404	0.38	0.565	0.435	0.255	0.232	0.311	0.203	0.00667	-3e-05	1.02	0.98	1.32	1.07	1.15	0.64	0.88	0.94	1.43	0.91	0.66	1	1.47	0.83	0.91	0.78	0.85	0.74	1.83	0.39	1.14	0.7	1.54	0.62	1.1	0.84	1.56	0.5	1.36
KU296468	West Africa	Sierra Leone	2015	2014-2016|West African Epidemic	0.3731	0.2544	0.3977	0.2353	55.61	0.519	0.404	0.38	0.565	0.435	0.255	0.232	0.311	0.203	0.00753	-0.00031	1.02	0.98	1.32	1.07	1.15	0.64	0.88	0.94	1.43	0.91	0.66	1	1.47	0.83	0.91	0.78	0.85	0.74	1.81	0.4	1.14	0.7	1.54	0.62	1.1	0.84	1.56	0.5	1.36
KY426694	West Africa	Sierra Leone	2015	2014-2016|West African Epidemic	0.3731	0.2545	0.3975	0.2352	55.62	0.519	0.404	0.38	0.564	0.436	0.255	0.232	0.311	0.203	0.00799	-0.00092	1.02	0.98	1.32	1.07	1.15	0.64	0.88	0.94	1.43	0.91	0.66	1	1.47	0.83	0.91	0.78	0.85	0.74	1.81	0.4	1.14	0.71	1.53	0.62	1.11	0.84	1.55	0.5	1.36
KU296627	West Africa	Sierra Leone	2015	2014-2016|West African Epidemic	0.3731	0.2544	0.3976	0.2352	55.62	0.52	0.404	0.38	0.564	0.436	0.255	0.232	0.311	0.203	0.00659	-2e-05	1.02	0.98	1.32	1.07	1.15	0.64	0.88	0.94	1.43	0.91	0.66	1	1.47	0.84	0.91	0.78	0.85	0.74	1.8	0.4	1.14	0.7	1.55	0.62	1.1	0.85	1.55	0.5	1.36
KU296759	West Africa	Sierra Leone	2015	2014-2016|West African Epidemic	0.3735	0.2541	0.3973	0.2355	55.62	0.519	0.404	0.38	0.564	0.436	0.255	0.232	0.311	0.203	0.00766	-0.00057	1.02	0.98	1.32	1.07	1.15	0.64	0.88	0.94	1.43	0.91	0.66	1	1.47	0.83	0.91	0.78	0.85	0.74	1.81	0.4	1.14	0.7	1.54	0.62	1.11	0.84	1.53	0.51	1.36
KU296742	West Africa	Sierra Leone	2015	2014-2016|West African Epidemic	0.3733	0.2544	0.3974	0.2353	55.62	0.519	0.404	0.38	0.564	0.436	0.255	0.232	0.311	0.203	0.00771	-0.0002	1.02	0.98	1.32	1.07	1.15	0.64	0.88	0.94	1.43	0.91	0.66	1	1.47	0.83	0.91	0.78	0.85	0.74	1.8	0.4	1.14	0.7	1.55	0.62	1.1	0.84	1.56	0.5	1.36
KU296531	West Africa	Sierra Leone	2015	2014-2016|West African Epidemic	0.3733	0.2541	0.398	0.235	55.6	0.52	0.404	0.38	0.564	0.436	0.255	0.232	0.311	0.203	0.00748	1e-05	1.02	0.98	1.33	1.06	1.15	0.64	0.88	0.94	1.43	0.91	0.66	1	1.47	0.83	0.91	0.78	0.85	0.74	1.8	0.4	1.14	0.7	1.55	0.62	1.1	0.85	1.55	0.5	1.36
KU296538	West Africa	Sierra Leone	2015	2014-2016|West African Epidemic	0.3733	0.2541	0.398	0.235	55.58	0.519	0.404	0.38	0.565	0.435	0.255	0.232	0.311	0.203	0.00563	0.00088	1.02	0.98	1.32	1.07	1.15	0.64	0.88	0.94	1.43	0.91	0.66	1	1.47	0.83	0.91	0.78	0.85	0.74	1.81	0.4	1.14	0.7	1.54	0.62	1.1	0.85	1.55	0.5	1.36
KU296630	West Africa	Sierra Leone	2014	2014-2016|West African Epidemic	0.3733	0.2539	0.398	0.2353	55.56	0.519	0.404	0.38	0.565	0.435	0.255	0.232	0.311	0.203	0.0066	0.00118	1.02	0.98	1.32	1.07	1.15	0.64	0.88	0.94	1.43	0.91	0.66	1	1.49	0.82	0.91	0.78	0.85	0.74	1.81	0.4	1.14	0.7	1.55	0.62	1.1	0.84	1.56	0.5	1.37
KU296792	West Africa	Sierra Leone	2015	2014-2016|West African Epidemic	0.373	0.2541	0.3982	0.2352	55.56	0.52	0.404	0.38	0.564	0.436	0.254	0.232	0.311	0.203	0.00667	0.00016	1.02	0.98	1.32	1.07	1.15	0.64	0.88	0.94	1.42	0.92	0.66	1	1.48	0.81	0.91	0.8	0.85	0.74	1.81	0.4	1.14	0.7	1.55	0.62	1.11	0.84	1.55	0.5	1.36
KU296438	West Africa	Sierra Leone	2015	2014-2016|West African Epidemic	0.3734	0.2539	0.3981	0.2349	55.6	0.519	0.404	0.38	0.565	0.435	0.255	0.232	0.311	0.203	0.0056	-0.00176	1.02	0.98	1.32	1.07	1.15	0.64	0.89	0.93	1.43	0.91	0.66	1	1.47	0.83	0.91	0.78	0.85	0.74	1.8	0.4	1.14	0.7	1.55	0.62	1.12	0.82	1.56	0.5	1.34
KU296767	West Africa	Sierra Leone	2015	2014-2016|West African Epidemic	0.3727	0.2543	0.3978	0.2355	55.62	0.519	0.404	0.38	0.564	0.436	0.254	0.232	0.311	0.203	0.00746	-0.00111	1.02	0.98	1.32	1.08	1.15	0.64	0.87	0.94	1.43	0.91	0.66	1	1.46	0.83	0.93	0.78	0.87	0.73	1.81	0.4	1.14	0.69	1.55	0.62	1.1	0.84	1.56	0.5	1.36
KU296696	West Africa	Sierra Leone	2015	2014-2016|West African Epidemic	0.3729	0.2542	0.3978	0.2357	55.58	0.519	0.404	0.38	0.564	0.436	0.254	0.232	0.311	0.203	0.00434	-0.00046	1.02	0.98	1.32	1.08	1.15	0.64	0.87	0.94	1.43	0.91	0.66	1	1.47	0.83	0.89	0.8	0.87	0.73	1.81	0.4	1.15	0.68	1.55	0.62	1.1	0.84	1.56	0.5	1.36
KU296381	West Africa	Sierra Leone	2015	2014-2016|West African Epidemic	0.3726	0.2542	0.3981	0.2357	55.6	0.519	0.404	0.38	0.565	0.435	0.254	0.232	0.311	0.203	0.00739	-0.00146	1.02	0.98	1.32	1.07	1.15	0.64	0.87	0.95	1.43	0.91	0.66	1	1.46	0.83	0.93	0.78	0.87	0.73	1.81	0.4	1.15	0.68	1.56	0.61	1.1	0.84	1.56	0.5	1.36
KU296805	West Africa	Sierra Leone	2015	2014-2016|West African Epidemic	0.3727	0.2543	0.3978	0.2355	55.63	0.519	0.404	0.38	0.564	0.436	0.254	0.232	0.311	0.203	0.0076	-0.00032	1.03	0.97	1.32	1.08	1.15	0.64	0.87	0.94	1.43	0.91	0.66	1	1.46	0.83	0.93	0.78	0.87	0.73	1.81	0.4	1.14	0.69	1.55	0.62	1.1	0.84	1.56	0.5	1.36
KU296758	West Africa	Sierra Leone	2015	2014-2016|West African Epidemic	0.3735	0.2538	0.3976	0.2355	55.58	0.519	0.404	0.38	0.564	0.436	0.255	0.232	0.311	0.203	0.00558	0.00032	1.02	0.98	1.32	1.07	1.15	0.64	0.88	0.94	1.44	0.9	0.66	1	1.47	0.84	0.89	0.8	0.85	0.74	1.81	0.4	1.15	0.68	1.55	0.62	1.11	0.84	1.55	0.5	1.36
KT357829	West Africa	Sierra Leone	2015	2014-2016|West African Epidemic	0.3736	0.2538	0.3976	0.235	55.59	0.519	0.404	0.38	0.564	0.436	0.255	0.232	0.311	0.203	0.00591	0.00123	1.03	0.97	1.33	1.06	1.15	0.64	0.88	0.94	1.43	0.9	0.67	1	1.48	0.84	0.88	0.8	0.85	0.74	1.81	0.4	1.15	0.69	1.54	0.62	1.11	0.84	1.55	0.5	1.36
KT357838	West Africa	Sierra Leone	2015	2014-2016|West African Epidemic	0.3734	0.2536	0.3984	0.2346	55.59	0.519	0.404	0.379	0.565	0.435	0.255	0.232	0.311	0.203	0.00319	-0.00128	1.03	0.97	1.33	1.06	1.15	0.64	0.88	0.94	1.44	0.89	0.67	1	1.47	0.84	0.89	0.8	0.85	0.74	1.81	0.4	1.15	0.69	1.54	0.62	1.12	0.83	1.55	0.5	1.36
KR653282	West Africa	Sierra Leone	2014	2014-2016|West African Epidemic	0.3739	0.254	0.3969	0.2354	55.63	0.52	0.404	0.38	0.564	0.436	0.255	0.232	0.311	0.203	0.0067	0.00031	1.03	0.97	1.32	1.07	1.13	0.65	0.88	0.94	1.44	0.9	0.66	1	1.47	0.84	0.89	0.8	0.85	0.74	1.8	0.4	1.16	0.69	1.52	0.62	1.11	0.84	1.54	0.5	1.35
MH607944	West Africa	Sierra Leone	2014	2014-2016|West African Epidemic	0.3729	0.2545	0.3977	0.2352	55.61	0.519	0.404	0.38	0.564	0.436	0.254	0.232	0.311	0.203	0.00738	-0.00047	1.02	0.98	1.32	1.07	1.15	0.64	0.88	0.94	1.43	0.91	0.66	1	1.47	0.83	0.91	0.78	0.85	0.74	1.81	0.4	1.13	0.71	1.54	0.62	1.11	0.84	1.55	0.5	1.36
KR653295	West Africa	Sierra Leone	2014	2014-2016|West African Epidemic	0.3729	0.2545	0.3977	0.2352	55.61	0.519	0.404	0.38	0.564	0.436	0.254	0.232	0.311	0.203	0.00738	-0.00047	1.02	0.98	1.32	1.07	1.15	0.64	0.88	0.94	1.43	0.91	0.66	1	1.47	0.83	0.91	0.78	0.85	0.74	1.81	0.4	1.13	0.71	1.54	0.62	1.11	0.84	1.55	0.5	1.36
KR653234	West Africa	Sierra Leone	2014	2014-2016|West African Epidemic	0.3729	0.2545	0.3977	0.2352	55.61	0.519	0.404	0.38	0.564	0.436	0.254	0.232	0.311	0.203	0.00738	-0.00047	1.02	0.98	1.32	1.07	1.15	0.64	0.88	0.94	1.43	0.91	0.66	1	1.47	0.83	0.91	0.78	0.85	0.74	1.81	0.4	1.13	0.71	1.54	0.62	1.11	0.84	1.55	0.5	1.36
KM233112	West Africa	Sierra Leone	2014	2014-2016|West African Epidemic	0.3729	0.2545	0.3977	0.2352	55.61	0.519	0.404	0.38	0.564	0.436	0.254	0.232	0.311	0.203	0.00738	-0.00047	1.02	0.98	1.32	1.07	1.15	0.64	0.88	0.94	1.43	0.91	0.66	1	1.47	0.83	0.91	0.78	0.85	0.74	1.81	0.4	1.13	0.71	1.54	0.62	1.11	0.84	1.55	0.5	1.36
KR534511	West Africa	Guinea	2014	2014-2016|West African Epidemic	0.3729	0.2545	0.3977	0.2352	55.61	0.519	0.404	0.38	0.564	0.436	0.254	0.232	0.311	0.203	0.00738	-0.00047	1.02	0.98	1.32	1.07	1.15	0.64	0.88	0.94	1.43	0.91	0.66	1	1.47	0.83	0.91	0.78	0.85	0.74	1.81	0.4	1.13	0.71	1.54	0.62	1.11	0.84	1.55	0.5	1.36
KR534529	West Africa	Guinea	2014	2014-2016|West African Epidemic	0.3729	0.2545	0.3977	0.2352	55.61	0.519	0.404	0.38	0.564	0.436	0.254	0.232	0.311	0.203	0.00738	-0.00047	1.02	0.98	1.32	1.07	1.15	0.64	0.88	0.94	1.43	0.91	0.66	1	1.47	0.83	0.91	0.78	0.85	0.74	1.81	0.4	1.13	0.71	1.54	0.62	1.11	0.84	1.55	0.5	1.36
KM233110	West Africa	Sierra Leone	2014	2014-2016|West African Epidemic	0.3729	0.2545	0.3977	0.2352	55.61	0.519	0.404	0.38	0.564	0.436	0.254	0.232	0.311	0.203	0.00738	-0.00047	1.02	0.98	1.32	1.07	1.15	0.64	0.88	0.94	1.43	0.91	0.66	1	1.47	0.83	0.91	0.78	0.85	0.74	1.81	0.4	1.13	0.71	1.54	0.62	1.11	0.84	1.55	0.5	1.36
KM233098	West Africa	Sierra Leone	2014	2014-2016|West African Epidemic	0.3729	0.2545	0.3977	0.2352	55.61	0.519	0.404	0.38	0.564	0.436	0.254	0.232	0.311	0.203	0.00738	-0.00047	1.02	0.98	1.32	1.07	1.15	0.64	0.88	0.94	1.43	0.91	0.66	1	1.47	0.83	0.91	0.78	0.85	0.74	1.81	0.4	1.13	0.71	1.54	0.62	1.11	0.84	1.55	0.5	1.36
KR105303	West Africa	Sierra Leone	2014	2014-2016|West African Epidemic	0.3729	0.2545	0.3977	0.2352	55.61	0.519	0.404	0.38	0.564	0.436	0.254	0.232	0.311	0.203	0.00738	-0.00047	1.02	0.98	1.32	1.07	1.15	0.64	0.88	0.94	1.43	0.91	0.66	1	1.47	0.83	0.91	0.78	0.85	0.74	1.81	0.4	1.13	0.71	1.54	0.62	1.11	0.84	1.55	0.5	1.36
KP759607	West Africa	Sierra Leone	2014	2014-2016|West African Epidemic	0.3729	0.2545	0.3977	0.2352	55.61	0.519	0.404	0.38	0.564	0.436	0.254	0.232	0.311	0.203	0.00738	-0.00047	1.02	0.98	1.32	1.07	1.15	0.64	0.88	0.94	1.43	0.91	0.66	1	1.47	0.83	0.91	0.78	0.85	0.74	1.81	0.4	1.13	0.71	1.54	0.62	1.11	0.84	1.55	0.5	1.36
KU296777	West Africa	Sierra Leone	2015	2014-2016|West African Epidemic	0.3728	0.2544	0.398	0.2353	55.6	0.519	0.404	0.38	0.564	0.436	0.255	0.232	0.311	0.203	0.00692	0.00014	1.02	0.98	1.32	1.07	1.15	0.64	0.88	0.94	1.43	0.91	0.66	1	1.47	0.83	0.91	0.78	0.85	0.74	1.81	0.4	1.14	0.7	1.55	0.62	1.1	0.84	1.56	0.5	1.36
KU143806	West Africa	Sierra Leone	2014	2014-2016|West African Epidemic	0.3734	0.2543	0.398	0.2346	55.57	0.519	0.404	0.38	0.565	0.435	0.255	0.232	0.311	0.203	0.0081	-0.00133	1.02	0.98	1.32	1.07	1.15	0.64	0.88	0.94	1.44	0.91	0.65	1	1.47	0.83	0.92	0.78	0.85	0.74	1.81	0.4	1.13	0.71	1.54	0.62	1.11	0.84	1.55	0.5	1.36
MH607896	West Africa	Sierra Leone	2014	2014-2016|West African Epidemic	0.3729	0.2545	0.398	0.2349	55.58	0.519	0.404	0.38	0.564	0.436	0.255	0.232	0.311	0.203	0.00744	-0.00095	1.02	0.98	1.31	1.07	1.14	0.64	0.88	0.95	1.42	0.92	0.66	1	1.47	0.83	0.91	0.78	0.85	0.74	1.81	0.4	1.14	0.71	1.55	0.61	1.11	0.84	1.56	0.49	1.35
KM233106	West Africa	Sierra Leone	2014	2014-2016|West African Epidemic	0.3731	0.2543	0.3977	0.2352	55.6	0.519	0.404	0.38	0.564	0.436	0.255	0.232	0.311	0.203	0.00685	-6e-05	1.02	0.98	1.32	1.07	1.15	0.64	0.88	0.94	1.43	0.91	0.66	1	1.47	0.83	0.91	0.78	0.85	0.74	1.81	0.4	1.15	0.69	1.54	0.62	1.11	0.84	1.55	0.5	1.36
KM233105	West Africa	Sierra Leone	2014	2014-2016|West African Epidemic	0.3731	0.2543	0.3977	0.2352	55.6	0.519	0.404	0.38	0.564	0.436	0.255	0.232	0.311	0.203	0.00685	-6e-05	1.02	0.98	1.32	1.07	1.15	0.64	0.88	0.94	1.43	0.91	0.66	1	1.47	0.83	0.91	0.78	0.85	0.74	1.81	0.4	1.15	0.69	1.54	0.62	1.11	0.84	1.55	0.5	1.36
KT725391	West Africa	Liberia	2014	2014-2016|West African Epidemic	0.3726	0.2543	0.3983	0.2352	55.58	0.519	0.404	0.38	0.565	0.435	0.255	0.232	0.311	0.203	0.00729	-0.00131	1.02	0.98	1.32	1.07	1.15	0.64	0.88	0.94	1.43	0.91	0.66	1	1.47	0.83	0.91	0.78	0.84	0.74	1.81	0.4	1.14	0.7	1.55	0.62	1.11	0.83	1.56	0.5	1.36
KT725377	West Africa	Liberia	2014	2014-2016|West African Epidemic	0.3731	0.2543	0.3977	0.2352	55.6	0.519	0.404	0.38	0.564	0.436	0.255	0.232	0.311	0.203	0.00685	-6e-05	1.02	0.98	1.32	1.07	1.15	0.64	0.88	0.94	1.43	0.91	0.66	1	1.47	0.83	0.91	0.78	0.85	0.74	1.81	0.4	1.15	0.69	1.54	0.62	1.11	0.84	1.55	0.5	1.36
KM034552	West Africa	Sierra Leone	2014	2014-2016|West African Epidemic	0.3731	0.2543	0.3977	0.2352	55.6	0.519	0.404	0.38	0.564	0.436	0.255	0.232	0.311	0.203	0.00685	-6e-05	1.02	0.98	1.32	1.07	1.15	0.64	0.88	0.94	1.43	0.91	0.66	1	1.47	0.83	0.91	0.78	0.85	0.74	1.81	0.4	1.15	0.69	1.54	0.62	1.11	0.84	1.55	0.5	1.36
KR817115	West Africa	Liberia	2014	2014-2016|West African Epidemic	0.3731	0.2543	0.3977	0.2352	55.6	0.519	0.404	0.38	0.564	0.436	0.255	0.232	0.311	0.203	0.00685	-6e-05	1.02	0.98	1.32	1.07	1.15	0.64	0.88	0.94	1.43	0.91	0.66	1	1.47	0.83	0.91	0.78	0.85	0.74	1.81	0.4	1.15	0.69	1.54	0.62	1.11	0.84	1.55	0.5	1.36
KR105222	West Africa	Sierra Leone	2014	2014-2016|West African Epidemic	0.3731	0.2543	0.3977	0.2352	55.6	0.519	0.404	0.38	0.564	0.436	0.255	0.232	0.311	0.203	0.00685	-6e-05	1.02	0.98	1.32	1.07	1.15	0.64	0.88	0.94	1.43	0.91	0.66	1	1.47	0.83	0.91	0.78	0.85	0.74	1.81	0.4	1.15	0.69	1.54	0.62	1.11	0.84	1.55	0.5	1.36
KR105229	West Africa	Sierra Leone	2014	2014-2016|West African Epidemic	0.3731	0.2543	0.3977	0.2352	55.6	0.519	0.404	0.38	0.564	0.436	0.255	0.232	0.311	0.203	0.00685	-6e-05	1.02	0.98	1.32	1.07	1.15	0.64	0.88	0.94	1.43	0.91	0.66	1	1.47	0.83	0.91	0.78	0.85	0.74	1.81	0.4	1.15	0.69	1.54	0.62	1.11	0.84	1.55	0.5	1.36
KM034556	West Africa	Sierra Leone	2014	2014-2016|West African Epidemic	0.3731	0.2543	0.3977	0.2352	55.6	0.519	0.404	0.38	0.564	0.436	0.255	0.232	0.311	0.203	0.00685	-6e-05	1.02	0.98	1.32	1.07	1.15	0.64	0.88	0.94	1.43	0.91	0.66	1	1.47	0.83	0.91	0.78	0.85	0.74	1.81	0.4	1.15	0.69	1.54	0.62	1.11	0.84	1.55	0.5	1.36
KM233071	West Africa	Sierra Leone	2014	2014-2016|West African Epidemic	0.3731	0.2543	0.3977	0.2352	55.6	0.519	0.404	0.38	0.564	0.436	0.255	0.232	0.311	0.203	0.00685	-6e-05	1.02	0.98	1.32	1.07	1.15	0.64	0.88	0.94	1.43	0.91	0.66	1	1.47	0.83	0.91	0.78	0.85	0.74	1.81	0.4	1.15	0.69	1.54	0.62	1.11	0.84	1.55	0.5	1.36
KM233049	West Africa	Sierra Leone	2014	2014-2016|West African Epidemic	0.3731	0.2543	0.3977	0.2352	55.6	0.519	0.404	0.38	0.564	0.436	0.255	0.232	0.311	0.203	0.00685	-6e-05	1.02	0.98	1.32	1.07	1.15	0.64	0.88	0.94	1.43	0.91	0.66	1	1.47	0.83	0.91	0.78	0.85	0.74	1.81	0.4	1.15	0.69	1.54	0.62	1.11	0.84	1.55	0.5	1.36
KM233116	West Africa	Sierra Leone	2014	2014-2016|West African Epidemic	0.3731	0.2543	0.3977	0.2352	55.6	0.519	0.404	0.38	0.564	0.436	0.255	0.232	0.311	0.203	0.00685	-6e-05	1.02	0.98	1.32	1.07	1.15	0.64	0.88	0.94	1.43	0.91	0.66	1	1.47	0.83	0.91	0.78	0.85	0.74	1.81	0.4	1.15	0.69	1.54	0.62	1.11	0.84	1.55	0.5	1.36
KM233047	West Africa	Sierra Leone	2014	2014-2016|West African Epidemic	0.3731	0.2543	0.3977	0.2352	55.6	0.519	0.404	0.38	0.564	0.436	0.255	0.232	0.311	0.203	0.00685	-6e-05	1.02	0.98	1.32	1.07	1.15	0.64	0.88	0.94	1.43	0.91	0.66	1	1.47	0.83	0.91	0.78	0.85	0.74	1.81	0.4	1.15	0.69	1.54	0.62	1.11	0.84	1.55	0.5	1.36
KM233084	West Africa	Sierra Leone	2014	2014-2016|West African Epidemic	0.3731	0.2543	0.3977	0.2352	55.6	0.519	0.404	0.38	0.564	0.436	0.255	0.232	0.311	0.203	0.00685	-6e-05	1.02	0.98	1.32	1.07	1.15	0.64	0.88	0.94	1.43	0.91	0.66	1	1.47	0.83	0.91	0.78	0.85	0.74	1.81	0.4	1.15	0.69	1.54	0.62	1.11	0.84	1.55	0.5	1.36
KM233040	West Africa	Sierra Leone	2014	2014-2016|West African Epidemic	0.3731	0.2543	0.3977	0.2352	55.6	0.519	0.404	0.38	0.564	0.436	0.255	0.232	0.311	0.203	0.00685	-6e-05	1.02	0.98	1.32	1.07	1.15	0.64	0.88	0.94	1.43	0.91	0.66	1	1.47	0.83	0.91	0.78	0.85	0.74	1.81	0.4	1.15	0.69	1.54	0.62	1.11	0.84	1.55	0.5	1.36
KM233073	West Africa	Sierra Leone	2014	2014-2016|West African Epidemic	0.3731	0.2543	0.3977	0.2352	55.6	0.519	0.404	0.38	0.564	0.436	0.255	0.232	0.311	0.203	0.00685	-6e-05	1.02	0.98	1.32	1.07	1.15	0.64	0.88	0.94	1.43	0.91	0.66	1	1.47	0.83	0.91	0.78	0.85	0.74	1.81	0.4	1.15	0.69	1.54	0.62	1.11	0.84	1.55	0.5	1.36
KR105341	West Africa	Sierra Leone	2014	2014-2016|West African Epidemic	0.3736	0.2538	0.3975	0.2354	55.59	0.519	0.404	0.38	0.564	0.436	0.255	0.232	0.311	0.203	0.00567	0.00012	1.03	0.97	1.32	1.07	1.15	0.64	0.88	0.94	1.44	0.9	0.66	1	1.47	0.84	0.89	0.8	0.85	0.74	1.81	0.4	1.15	0.69	1.54	0.62	1.11	0.84	1.55	0.5	1.36
KP184503	West Africa	Sierra Leone	2014	2014-2016|West African Epidemic	0.3731	0.2545	0.3972	0.2355	55.61	0.519	0.404	0.381	0.564	0.436	0.255	0.232	0.311	0.203	0.00713	4e-05	1.02	0.98	1.32	1.07	1.15	0.65	0.87	0.94	1.43	0.91	0.66	1	1.47	0.83	0.91	0.78	0.85	0.74	1.81	0.4	1.15	0.69	1.54	0.62	1.11	0.84	1.55	0.5	1.36
KR534534	West Africa	Guinea	2014	2014-2016|West African Epidemic	0.373	0.2543	0.3973	0.2357	55.61	0.519	0.404	0.381	0.564	0.436	0.254	0.232	0.311	0.203	0.00974	-0.001	1.02	0.98	1.32	1.07	1.15	0.64	0.88	0.94	1.43	0.91	0.66	1	1.49	0.82	0.91	0.78	0.85	0.74	1.81	0.4	1.13	0.71	1.54	0.62	1.11	0.84	1.55	0.5	1.36
KR653275	West Africa	Sierra Leone	2014	2014-2016|West African Epidemic	0.3729	0.2545	0.398	0.2349	55.61	0.519	0.404	0.38	0.564	0.436	0.254	0.232	0.311	0.203	0.00739	-0.00056	1.02	0.98	1.32	1.07	1.15	0.64	0.88	0.94	1.43	0.91	0.66	1	1.47	0.83	0.91	0.78	0.85	0.74	1.81	0.4	1.13	0.71	1.54	0.62	1.11	0.84	1.55	0.5	1.36
KR817238	West Africa	Sierra Leone	2014	2014-2016|West African Epidemic	0.3734	0.254	0.398	0.2349	55.6	0.519	0.404	0.38	0.565	0.435	0.255	0.232	0.311	0.203	0.00649	-2e-05	1.02	0.98	1.31	1.08	1.15	0.64	0.88	0.94	1.42	0.91	0.67	1	1.47	0.83	0.93	0.77	0.87	0.73	1.81	0.4	1.15	0.69	1.54	0.62	1.11	0.84	1.55	0.5	1.36
KT725315	West Africa	Liberia	2014	2014-2016|West African Epidemic	0.3729	0.2545	0.3977	0.2352	55.61	0.519	0.404	0.38	0.564	0.436	0.254	0.232	0.311	0.203	0.00661	0.00039	1.02	0.98	1.32	1.07	1.15	0.64	0.88	0.94	1.43	0.91	0.66	1	1.47	0.83	0.91	0.78	0.85	0.74	1.81	0.4	1.15	0.69	1.54	0.62	1.11	0.84	1.55	0.5	1.36
KT725387	West Africa	Liberia	2014	2014-2016|West African Epidemic	0.3731	0.2545	0.3976	0.2352	55.59	0.519	0.404	0.38	0.564	0.436	0.255	0.232	0.311	0.203	0.0066	-0.00079	1.02	0.98	1.32	1.07	1.15	0.64	0.88	0.94	1.43	0.92	0.65	1	1.47	0.83	0.91	0.78	0.86	0.74	1.81	0.4	1.15	0.69	1.54	0.62	1.11	0.84	1.55	0.5	1.36
KR817121	West Africa	Guinea	2014	2014-2016|West African Epidemic	0.3731	0.2545	0.3976	0.2352	55.59	0.519	0.404	0.38	0.564	0.436	0.255	0.232	0.311	0.203	0.0066	-0.00079	1.02	0.98	1.32	1.07	1.15	0.64	0.88	0.94	1.43	0.92	0.65	1	1.47	0.83	0.91	0.78	0.86	0.74	1.81	0.4	1.15	0.69	1.54	0.62	1.11	0.84	1.55	0.5	1.36
KT725283	West Africa	Liberia	2014	2014-2016|West African Epidemic	0.3734	0.2543	0.3978	0.2349	55.61	0.519	0.404	0.38	0.565	0.435	0.255	0.232	0.311	0.203	0.00787	-0.00031	1.03	0.97	1.32	1.06	1.15	0.64	0.88	0.94	1.43	0.91	0.66	1	1.47	0.83	0.91	0.78	0.85	0.74	1.8	0.42	1.15	0.7	1.55	0.61	1.11	0.84	1.55	0.5	1.36
KT725367	West Africa	Liberia	2014	2014-2016|West African Epidemic	0.3725	0.2545	0.398	0.2352	55.58	0.519	0.404	0.38	0.564	0.436	0.255	0.232	0.311	0.203	0.00766	-0.00119	1.02	0.98	1.32	1.07	1.15	0.65	0.87	0.94	1.43	0.91	0.66	1	1.47	0.83	0.91	0.78	0.84	0.74	1.81	0.4	1.14	0.7	1.55	0.62	1.11	0.83	1.56	0.5	1.35
KU220281	West Africa	Liberia	2014	2014-2016|West African Epidemic	0.3728	0.2541	0.3983	0.2352	55.57	0.519	0.404	0.38	0.565	0.435	0.255	0.232	0.311	0.203	0.00727	-0.00145	1.02	0.98	1.32	1.07	1.16	0.63	0.88	0.94	1.43	0.91	0.66	1	1.47	0.83	0.91	0.78	0.84	0.74	1.81	0.4	1.14	0.7	1.55	0.62	1.11	0.83	1.56	0.5	1.36
KP240933	West Africa	Liberia	2014	2014-2016|West African Epidemic	0.3723	0.2548	0.3986	0.2346	55.57	0.519	0.404	0.38	0.565	0.435	0.254	0.232	0.311	0.202	0.00811	-0.00198	1.02	0.98	1.33	1.06	1.15	0.65	0.87	0.94	1.43	0.91	0.66	1	1.47	0.83	0.91	0.78	0.84	0.74	1.81	0.4	1.12	0.71	1.55	0.62	1.11	0.83	1.56	0.5	1.36
KU220272	West Africa	Liberia	2015	2014-2016|West African Epidemic	0.3726	0.2543	0.3983	0.2352	55.58	0.519	0.404	0.38	0.565	0.435	0.255	0.232	0.311	0.203	0.00768	-0.00143	1.01	0.99	1.32	1.07	1.16	0.63	0.88	0.94	1.43	0.91	0.66	1	1.47	0.83	0.91	0.78	0.84	0.74	1.81	0.4	1.14	0.7	1.55	0.62	1.11	0.83	1.56	0.5	1.36
KT725364	West Africa	Liberia	2014	2014-2016|West African Epidemic	0.3734	0.2543	0.3977	0.2349	55.6	0.519	0.404	0.38	0.565	0.435	0.255	0.232	0.311	0.203	0.007	-4e-05	1.02	0.98	1.32	1.07	1.15	0.64	0.88	0.94	1.43	0.91	0.66	1	1.47	0.83	0.91	0.78	0.85	0.76	1.79	0.4	1.15	0.69	1.54	0.62	1.11	0.84	1.56	0.49	1.36
KU156714	West Africa	Sierra Leone	2014	2014-2016|West African Epidemic	0.3731	0.2543	0.3977	0.2352	55.61	0.519	0.404	0.38	0.565	0.435	0.255	0.232	0.311	0.203	0.00714	0	1.02	0.98	1.32	1.07	1.15	0.64	0.88	0.94	1.42	0.91	0.67	1	1.47	0.83	0.91	0.78	0.85	0.74	1.81	0.4	1.15	0.69	1.54	0.62	1.11	0.84	1.54	0.5	1.36
KR653244	West Africa	Sierra Leone	2014	2014-2016|West African Epidemic	0.3732	0.2543	0.3973	0.2355	55.65	0.519	0.404	0.38	0.564	0.436	0.255	0.232	0.311	0.203	0.00933	-0.00032	1.02	0.98	1.32	1.07	1.13	0.65	0.88	0.94	1.43	0.91	0.66	1	1.48	0.83	0.91	0.77	0.87	0.74	1.79	0.42	1.14	0.7	1.55	0.62	1.11	0.84	1.55	0.5	1.36
KR105215	West Africa	Sierra Leone	2014	2014-2016|West African Epidemic	0.3731	0.2543	0.3975	0.2355	55.6	0.519	0.404	0.38	0.564	0.436	0.255	0.232	0.311	0.203	0.00698	0.00022	1.02	0.98	1.32	1.07	1.15	0.64	0.88	0.94	1.43	0.91	0.66	1	1.47	0.83	0.91	0.78	0.85	0.74	1.81	0.4	1.15	0.69	1.54	0.62	1.11	0.84	1.55	0.5	1.36
KR105298	West Africa	Sierra Leone	2014	2014-2016|West African Epidemic	0.3729	0.2545	0.3977	0.2352	55.61	0.519	0.404	0.38	0.564	0.436	0.254	0.232	0.311	0.203	0.00735	-0.00043	1.02	0.98	1.32	1.07	1.15	0.64	0.88	0.94	1.43	0.91	0.66	1	1.47	0.83	0.91	0.78	0.85	0.74	1.81	0.4	1.13	0.71	1.54	0.62	1.1	0.84	1.56	0.5	1.36
KR653225	West Africa	Sierra Leone	2014	2014-2016|West African Epidemic	0.3729	0.2545	0.3977	0.2352	55.61	0.519	0.404	0.38	0.564	0.436	0.254	0.232	0.311	0.203	0.00735	-0.00043	1.02	0.98	1.32	1.07	1.15	0.64	0.88	0.94	1.43	0.91	0.66	1	1.47	0.83	0.91	0.78	0.85	0.74	1.81	0.4	1.13	0.71	1.54	0.62	1.1	0.84	1.56	0.5	1.36
KR105327	West Africa	Sierra Leone	2014	2014-2016|West African Epidemic	0.373	0.2542	0.3982	0.2349	55.59	0.519	0.404	0.38	0.565	0.435	0.255	0.232	0.311	0.203	0.00721	2e-05	1.02	0.98	1.32	1.07	1.15	0.64	0.88	0.94	1.42	0.91	0.67	1	1.47	0.83	0.91	0.78	0.85	0.74	1.81	0.4	1.15	0.69	1.54	0.62	1.11	0.84	1.55	0.5	1.36
KR105311	West Africa	Sierra Leone	2014	2014-2016|West African Epidemic	0.373	0.2542	0.3982	0.2349	55.59	0.519	0.404	0.38	0.565	0.435	0.255	0.232	0.311	0.203	0.00721	2e-05	1.02	0.98	1.32	1.07	1.15	0.64	0.88	0.94	1.42	0.91	0.67	1	1.47	0.83	0.91	0.78	0.85	0.74	1.81	0.4	1.15	0.69	1.54	0.62	1.11	0.84	1.55	0.5	1.36
KR105258	West Africa	Sierra Leone	2014	2014-2016|West African Epidemic	0.3731	0.2543	0.3977	0.2352	55.6	0.519	0.404	0.38	0.564	0.436	0.255	0.232	0.311	0.203	0.00763	-0.00092	1.02	0.98	1.32	1.07	1.15	0.64	0.88	0.94	1.43	0.91	0.66	1	1.47	0.83	0.91	0.78	0.85	0.74	1.81	0.4	1.13	0.71	1.54	0.62	1.11	0.84	1.55	0.5	1.36
KR105332	West Africa	Sierra Leone	2014	2014-2016|West African Epidemic	0.3729	0.2545	0.3977	0.2352	55.63	0.519	0.404	0.38	0.564	0.436	0.254	0.232	0.311	0.203	0.00815	-0.0002	1.02	0.98	1.32	1.06	1.15	0.64	0.88	0.95	1.42	0.91	0.67	1	1.47	0.83	0.91	0.78	0.85	0.74	1.81	0.4	1.13	0.71	1.54	0.62	1.11	0.84	1.54	0.5	1.36
KM233042	West Africa	Sierra Leone	2014	2014-2016|West African Epidemic	0.3732	0.2543	0.3977	0.2352	55.62	0.519	0.404	0.38	0.565	0.435	0.255	0.232	0.311	0.203	0.00749	-0.00056	1.02	0.98	1.32	1.07	1.15	0.64	0.88	0.94	1.43	0.91	0.66	1	1.47	0.83	0.91	0.78	0.85	0.74	1.81	0.4	1.15	0.69	1.54	0.62	1.11	0.84	1.55	0.5	1.36
KR653232	West Africa	Sierra Leone	2014	2014-2016|West African Epidemic	0.3729	0.2545	0.398	0.2349	55.61	0.519	0.404	0.38	0.564	0.436	0.254	0.232	0.311	0.203	0.00748	-0.00038	1.02	0.98	1.32	1.06	1.15	0.64	0.89	0.94	1.44	0.9	0.66	1	1.47	0.83	0.91	0.78	0.85	0.74	1.81	0.4	1.13	0.71	1.54	0.62	1.11	0.84	1.55	0.5	1.34
KR653301	West Africa	Sierra Leone	2014	2014-2016|West African Epidemic	0.3726	0.2548	0.3977	0.2352	55.63	0.519	0.404	0.381	0.564	0.436	0.254	0.232	0.311	0.203	0.00794	0.0008	1.02	0.98	1.32	1.07	1.15	0.64	0.88	0.94	1.43	0.91	0.66	1	1.47	0.83	0.91	0.78	0.86	0.74	1.81	0.4	1.13	0.71	1.54	0.62	1.11	0.84	1.55	0.5	1.36
KM034555	West Africa	Sierra Leone	2014	2014-2016|West African Epidemic	0.3734	0.2538	0.3976	0.2354	55.61	0.519	0.404	0.38	0.564	0.436	0.255	0.232	0.311	0.203	0.00701	0.00065	1.03	0.97	1.32	1.07	1.15	0.64	0.88	0.94	1.43	0.91	0.66	1	1.47	0.83	0.91	0.78	0.85	0.74	1.81	0.4	1.15	0.68	1.55	0.62	1.11	0.84	1.55	0.5	1.36
KM034554	West Africa	Sierra Leone	2014	2014-2016|West African Epidemic	0.3734	0.2538	0.3976	0.2354	55.61	0.519	0.404	0.38	0.564	0.436	0.255	0.232	0.311	0.203	0.00701	0.00065	1.03	0.97	1.32	1.07	1.15	0.64	0.88	0.94	1.43	0.91	0.66	1	1.47	0.83	0.91	0.78	0.85	0.74	1.81	0.4	1.15	0.68	1.55	0.62	1.11	0.84	1.55	0.5	1.36
KR105262	West Africa	Sierra Leone	2014	2014-2016|West African Epidemic	0.3729	0.2545	0.3978	0.2353	55.6	0.519	0.404	0.38	0.565	0.435	0.255	0.232	0.311	0.203	0.00753	-0.00048	1.03	0.97	1.32	1.07	1.15	0.64	0.88	0.94	1.43	0.91	0.66	1	1.46	0.83	0.91	0.79	0.84	0.74	1.81	0.4	1.13	0.71	1.54	0.62	1.11	0.84	1.55	0.5	1.36
KR653260	West Africa	Sierra Leone	2014	2014-2016|West African Epidemic	0.3731	0.2543	0.398	0.2349	55.62	0.519	0.404	0.38	0.565	0.435	0.255	0.232	0.311	0.203	0.00657	-0.00047	1.02	0.98	1.32	1.07	1.15	0.64	0.88	0.94	1.42	0.91	0.67	1	1.47	0.83	0.91	0.78	0.87	0.73	1.81	0.4	1.13	0.71	1.54	0.62	1.11	0.84	1.54	0.5	1.36
KR534577	West Africa	Guinea	2014	2014-2016|West African Epidemic	0.3727	0.2548	0.3975	0.2355	55.65	0.519	0.404	0.381	0.564	0.436	0.254	0.232	0.311	0.203	0.00636	-0.00042	1.02	0.98	1.32	1.07	1.15	0.64	0.88	0.94	1.43	0.91	0.66	1	1.47	0.83	0.91	0.78	0.85	0.74	1.81	0.4	1.13	0.71	1.54	0.62	1.11	0.84	1.54	0.51	1.36
KR534564	West Africa	Guinea	2014	2014-2016|West African Epidemic	0.3724	0.255	0.398	0.2349	55.63	0.519	0.404	0.381	0.564	0.436	0.254	0.232	0.311	0.203	0.00726	-0.00122	1.02	0.98	1.33	1.06	1.15	0.64	0.88	0.94	1.42	0.92	0.66	1	1.47	0.83	0.91	0.78	0.85	0.74	1.81	0.4	1.13	0.71	1.54	0.62	1.11	0.84	1.54	0.5	1.34
KP759599	West Africa	Sierra Leone	2014	2014-2016|West African Epidemic	0.3725	0.2547	0.3977	0.2352	55.62	0.519	0.404	0.381	0.564	0.436	0.254	0.232	0.311	0.203	0.00762	0.00123	1.02	0.98	1.32	1.07	1.15	0.64	0.88	0.94	1.43	0.91	0.66	1	1.47	0.83	0.91	0.78	0.85	0.74	1.81	0.4	1.13	0.71	1.54	0.62	1.1	0.85	1.55	0.5	1.36
KP759595	West Africa	Sierra Leone	2014	2014-2016|West African Epidemic	0.3725	0.2547	0.3977	0.2352	55.62	0.519	0.404	0.381	0.564	0.436	0.254	0.232	0.311	0.203	0.00762	0.00123	1.02	0.98	1.32	1.07	1.15	0.64	0.88	0.94	1.43	0.91	0.66	1	1.47	0.83	0.91	0.78	0.85	0.74	1.81	0.4	1.13	0.71	1.54	0.62	1.1	0.85	1.55	0.5	1.36
KP759648	West Africa	Sierra Leone	2014	2014-2016|West African Epidemic	0.3729	0.2545	0.398	0.2349	55.61	0.519	0.404	0.38	0.564	0.436	0.254	0.232	0.311	0.203	0.00855	-0.00038	1.02	0.98	1.33	1.06	1.15	0.64	0.88	0.94	1.42	0.92	0.66	1	1.47	0.83	0.91	0.78	0.84	0.76	1.81	0.4	1.13	0.71	1.54	0.62	1.11	0.84	1.54	0.5	1.35
KP759635	West Africa	Sierra Leone	2014	2014-2016|West African Epidemic	0.3723	0.2547	0.398	0.2352	55.62	0.519	0.404	0.381	0.564	0.436	0.254	0.232	0.311	0.203	0.0073	0	1.02	0.98	1.32	1.07	1.15	0.64	0.88	0.94	1.41	0.91	0.68	1	1.47	0.83	0.91	0.78	0.85	0.74	1.81	0.4	1.13	0.71	1.54	0.62	1.11	0.84	1.54	0.5	1.36
KP759602	West Africa	Sierra Leone	2014	2014-2016|West African Epidemic	0.3736	0.2538	0.3975	0.2354	55.59	0.519	0.404	0.38	0.565	0.435	0.255	0.232	0.311	0.203	0.00559	0.00047	1.02	0.98	1.31	1.07	1.14	0.65	0.88	0.94	1.44	0.9	0.66	1	1.47	0.84	0.89	0.8	0.85	0.74	1.81	0.4	1.15	0.68	1.55	0.62	1.11	0.84	1.55	0.5	1.36
KP759656	West Africa	Sierra Leone	2014	2014-2016|West African Epidemic	0.3729	0.2545	0.3977	0.2352	55.61	0.519	0.404	0.38	0.564	0.436	0.254	0.232	0.311	0.203	0.00745	0.00045	1.02	0.98	1.32	1.07	1.15	0.64	0.88	0.94	1.42	0.92	0.66	1	1.47	0.83	0.91	0.78	0.85	0.74	1.8	0.4	1.13	0.71	1.54	0.62	1.1	0.85	1.55	0.5	1.36
KP759601	West Africa	Sierra Leone	2014	2014-2016|West African Epidemic	0.3729	0.2548	0.3972	0.2355	55.64	0.519	0.404	0.381	0.564	0.436	0.254	0.232	0.311	0.203	0.00568	-0.00023	1.02	0.98	1.32	1.07	1.15	0.64	0.89	0.93	1.43	0.91	0.66	1	1.47	0.85	0.89	0.78	0.85	0.74	1.81	0.4	1.13	0.71	1.52	0.63	1.11	0.84	1.55	0.5	1.36
KP759636	West Africa	Sierra Leone	2014	2014-2016|West African Epidemic	0.3734	0.254	0.3977	0.2351	55.59	0.519	0.404	0.38	0.564	0.436	0.255	0.232	0.311	0.203	0.0067	0.0003	1.02	0.98	1.32	1.07	1.15	0.64	0.88	0.94	1.44	0.9	0.66	1	1.47	0.84	0.91	0.78	0.85	0.74	1.81	0.4	1.15	0.69	1.54	0.62	1.11	0.84	1.55	0.5	1.36
KP759616	West Africa	Sierra Leone	2014	2014-2016|West African Epidemic	0.373	0.2542	0.3978	0.2351	55.6	0.519	0.404	0.38	0.564	0.436	0.255	0.232	0.311	0.203	0.00767	-0.00104	1.02	0.98	1.32	1.07	1.15	0.64	0.88	0.94	1.42	0.91	0.67	1	1.47	0.83	0.91	0.78	0.85	0.74	1.81	0.4	1.13	0.71	1.54	0.62	1.11	0.84	1.55	0.5	1.36
KT946869	West Africa	Sierra Leone	2014	2014-2016|West African Epidemic	0.3735	0.2541	0.3978	0.2349	55.56	0.519	0.404	0.38	0.565	0.435	0.255	0.232	0.311	0.203	0.00678	-0.00322	1.02	0.98	1.32	1.07	1.15	0.64	0.88	0.94	1.43	0.91	0.66	1	1.48	0.83	0.91	0.77	0.85	0.74	1.81	0.4	1.13	0.71	1.54	0.62	1.11	0.84	1.55	0.5	1.36
KR817124	West Africa	Guinea	2014	2014-2016|West African Epidemic	0.3721	0.2553	0.3973	0.2353	55.68	0.52	0.404	0.381	0.564	0.436	0.254	0.232	0.311	0.203	0.00904	-0.00088	1.02	0.98	1.3	1.07	1.16	0.64	0.89	0.94	1.42	0.92	0.66	1	1.47	0.83	0.91	0.78	0.84	0.76	1.81	0.4	1.15	0.69	1.52	0.63	1.12	0.84	1.55	0.5	1.33
KR653269	West Africa	Sierra Leone	2014	2014-2016|West African Epidemic	0.3729	0.2548	0.3973	0.2351	55.61	0.519	0.404	0.381	0.564	0.436	0.254	0.232	0.311	0.203	0.00757	-0.00022	1.02	0.98	1.33	1.06	1.15	0.65	0.87	0.94	1.43	0.91	0.66	1	1.47	0.83	0.91	0.78	0.85	0.74	1.8	0.4	1.15	0.69	1.54	0.62	1.11	0.84	1.55	0.5	1.34
KR653290	West Africa	Sierra Leone	2014	2014-2016|West African Epidemic	0.3726	0.2548	0.3977	0.2352	55.63	0.519	0.404	0.381	0.564	0.436	0.254	0.232	0.311	0.203	0.008	0.00155	1.02	0.98	1.32	1.07	1.15	0.64	0.88	0.94	1.43	0.91	0.66	1	1.46	0.83	0.91	0.79	0.85	0.74	1.81	0.4	1.13	0.71	1.54	0.62	1.11	0.84	1.55	0.5	1.36
KR653276	West Africa	Sierra Leone	2014	2014-2016|West African Epidemic	0.3731	0.2543	0.3977	0.2352	55.59	0.519	0.404	0.38	0.565	0.435	0.255	0.232	0.311	0.203	0.00787	-0.00075	1.02	0.98	1.32	1.07	1.15	0.64	0.88	0.94	1.43	0.91	0.66	1	1.47	0.83	0.91	0.78	0.85	0.74	1.81	0.4	1.13	0.71	1.54	0.62	1.1	0.84	1.56	0.5	1.36
KY426698	West Africa	Sierra Leone	2015	2014-2016|West African Epidemic	0.3729	0.2548	0.3976	0.235	55.63	0.519	0.404	0.38	0.564	0.436	0.255	0.232	0.311	0.203	0.0074	-0.00094	1.02	0.98	1.32	1.07	1.14	0.65	0.88	0.94	1.44	0.91	0.65	1	1.47	0.83	0.91	0.8	0.85	0.74	1.81	0.4	1.13	0.71	1.54	0.62	1.11	0.84	1.55	0.5	1.36
KT357855	West Africa	Sierra Leone	2015	2014-2016|West African Epidemic	0.3729	0.2548	0.3976	0.235	55.63	0.519	0.404	0.38	0.564	0.436	0.255	0.232	0.311	0.203	0.0074	-0.00094	1.02	0.98	1.32	1.07	1.14	0.65	0.88	0.94	1.44	0.91	0.65	1	1.47	0.83	0.91	0.8	0.85	0.74	1.81	0.4	1.13	0.71	1.54	0.62	1.11	0.84	1.55	0.5	1.36
KY426708	West Africa	Sierra Leone	2015	2014-2016|West African Epidemic	0.3729	0.255	0.3973	0.235	55.65	0.519	0.404	0.381	0.564	0.436	0.254	0.232	0.311	0.203	0.00726	-0.00096	1.02	0.98	1.32	1.07	1.14	0.65	0.88	0.94	1.44	0.91	0.65	1	1.47	0.83	0.91	0.8	0.85	0.74	1.81	0.4	1.13	0.71	1.54	0.62	1.11	0.84	1.55	0.5	1.36
KY426706	West Africa	Sierra Leone	2015	2014-2016|West African Epidemic	0.3725	0.2547	0.3976	0.2353	55.62	0.519	0.404	0.381	0.564	0.436	0.254	0.232	0.311	0.203	0.00708	-0.00041	1.02	0.98	1.32	1.07	1.13	0.65	0.88	0.95	1.44	0.91	0.65	1	1.47	0.83	0.91	0.8	0.85	0.74	1.81	0.4	1.13	0.71	1.54	0.62	1.11	0.84	1.55	0.5	1.36
KU143820	West Africa	Sierra Leone	2014	2014-2016|West African Epidemic	0.373	0.2548	0.3977	0.2348	55.62	0.519	0.404	0.38	0.564	0.436	0.255	0.232	0.311	0.203	0.00756	-0.00112	1.02	0.98	1.33	1.07	1.14	0.64	0.88	0.94	1.43	0.92	0.65	1	1.47	0.83	0.91	0.78	0.85	0.74	1.81	0.4	1.13	0.71	1.54	0.62	1.11	0.84	1.55	0.5	1.36
KP759662	West Africa	Sierra Leone	2014	2014-2016|West African Epidemic	0.3731	0.2543	0.3975	0.2354	55.6	0.52	0.404	0.38	0.564	0.436	0.255	0.232	0.311	0.203	0.00602	-0.0001	1.02	0.98	1.32	1.07	1.15	0.64	0.88	0.94	1.43	0.91	0.66	1	1.47	0.84	0.89	0.8	0.85	0.74	1.81	0.4	1.15	0.69	1.54	0.62	1.11	0.84	1.55	0.5	1.36
KP759707	West Africa	Sierra Leone	2014	2014-2016|West African Epidemic	0.3734	0.254	0.398	0.2348	55.58	0.52	0.404	0.38	0.564	0.436	0.255	0.232	0.311	0.203	0.00647	0.00087	1.03	0.97	1.33	1.06	1.14	0.64	0.88	0.94	1.44	0.9	0.66	1	1.47	0.84	0.89	0.8	0.85	0.74	1.81	0.4	1.15	0.69	1.54	0.62	1.11	0.84	1.55	0.5	1.36
KP759727	West Africa	Sierra Leone	2014	2014-2016|West African Epidemic	0.3726	0.2548	0.3977	0.2351	55.62	0.519	0.404	0.381	0.564	0.436	0.254	0.232	0.311	0.203	0.00761	-0.00135	1.02	0.98	1.32	1.07	1.15	0.64	0.88	0.94	1.42	0.92	0.66	1	1.47	0.83	0.91	0.78	0.85	0.74	1.81	0.4	1.13	0.71	1.54	0.62	1.12	0.84	1.55	0.5	1.34
KP759720	West Africa	Sierra Leone	2014	2014-2016|West African Epidemic	0.3726	0.2548	0.3975	0.2355	55.62	0.519	0.404	0.381	0.564	0.436	0.254	0.232	0.311	0.203	0.00697	-0.0009	1.02	0.98	1.32	1.07	1.15	0.64	0.88	0.94	1.43	0.91	0.66	1	1.47	0.83	0.91	0.78	0.85	0.74	1.81	0.4	1.13	0.71	1.54	0.62	1.11	0.84	1.54	0.5	1.35
KP759763	West Africa	Sierra Leone	2014	2014-2016|West African Epidemic	0.373	0.2542	0.398	0.2349	55.56	0.519	0.404	0.38	0.565	0.435	0.255	0.232	0.311	0.203	0.00756	0.00174	1.02	0.98	1.32	1.07	1.15	0.64	0.88	0.94	1.43	0.91	0.66	1	1.47	0.83	0.91	0.78	0.85	0.74	1.81	0.4	1.13	0.71	1.54	0.62	1.1	0.84	1.56	0.5	1.36
KP759733	West Africa	Sierra Leone	2014	2014-2016|West African Epidemic	0.3729	0.2545	0.3977	0.2352	55.62	0.519	0.404	0.38	0.564	0.436	0.254	0.232	0.311	0.203	0.00756	0.00022	1.02	0.98	1.32	1.07	1.15	0.64	0.88	0.94	1.43	0.91	0.66	1	1.48	0.83	0.91	0.77	0.85	0.74	1.81	0.4	1.13	0.71	1.54	0.62	1.1	0.84	1.56	0.5	1.36
KU143781	West Africa	Sierra Leone	2014	2014-2016|West African Epidemic	0.3726	0.2548	0.3972	0.2358	55.65	0.519	0.404	0.381	0.564	0.436	0.254	0.232	0.311	0.203	0.00763	-0.0002	1.02	0.98	1.32	1.07	1.15	0.64	0.88	0.94	1.43	0.91	0.66	1	1.47	0.83	0.91	0.78	0.85	0.74	1.81	0.4	1.15	0.69	1.54	0.62	1.11	0.84	1.55	0.5	1.36
KU143776	West Africa	Sierra Leone	2014	2014-2016|West African Epidemic	0.3729	0.2545	0.398	0.2349	55.59	0.519	0.404	0.38	0.565	0.435	0.254	0.232	0.311	0.203	0.00575	0.00045	1.02	0.98	1.32	1.07	1.15	0.64	0.88	0.94	1.43	0.91	0.66	1	1.47	0.83	0.91	0.78	0.85	0.74	1.81	0.4	1.13	0.71	1.54	0.62	1.11	0.84	1.55	0.5	1.36
KP759661	West Africa	Sierra Leone	2014	2014-2016|West African Epidemic	0.3734	0.254	0.3972	0.2357	55.6	0.519	0.404	0.38	0.564	0.436	0.255	0.232	0.311	0.203	0.00402	0.00075	1.02	0.98	1.32	1.07	1.15	0.64	0.88	0.94	1.44	0.9	0.66	1	1.47	0.84	0.89	0.8	0.85	0.74	1.81	0.4	1.15	0.69	1.54	0.62	1.11	0.84	1.55	0.5	1.37
KY426686	West Africa	Sierra Leone	2015	2014-2016|West African Epidemic	0.3729	0.2545	0.3975	0.2355	55.63	0.519	0.404	0.381	0.564	0.436	0.254	0.232	0.311	0.203	0.00661	-0.00095	1.02	0.98	1.3	1.09	1.15	0.64	0.88	0.94	1.43	0.91	0.66	1	1.46	0.85	0.91	0.78	0.85	0.74	1.81	0.4	1.13	0.71	1.54	0.62	1.11	0.84	1.55	0.5	1.36
KY426717	West Africa	Sierra Leone	2015	2014-2016|West African Epidemic	0.3725	0.2547	0.3975	0.2355	55.63	0.519	0.404	0.381	0.564	0.436	0.254	0.232	0.311	0.203	0.00931	0.00036	1.02	0.98	1.32	1.07	1.15	0.64	0.88	0.94	1.43	0.91	0.66	1	1.47	0.83	0.91	0.78	0.85	0.74	1.81	0.4	1.13	0.71	1.54	0.62	1.1	0.85	1.55	0.5	1.36
KU143817	West Africa	Sierra Leone	2014	2014-2016|West African Epidemic	0.3725	0.2547	0.3975	0.2355	55.6	0.519	0.404	0.381	0.564	0.436	0.254	0.232	0.311	0.203	0.00859	0.00164	1.02	0.98	1.33	1.07	1.15	0.64	0.87	0.94	1.43	0.91	0.66	1	1.47	0.83	0.91	0.78	0.84	0.74	1.81	0.4	1.13	0.71	1.54	0.62	1.1	0.85	1.55	0.5	1.36
KU143833	West Africa	Sierra Leone	2014	2014-2016|West African Epidemic	0.3724	0.2549	0.3976	0.2352	55.63	0.519	0.404	0.381	0.564	0.436	0.254	0.232	0.311	0.203	0.00769	0.0024	1.02	0.98	1.32	1.07	1.15	0.64	0.88	0.94	1.42	0.91	0.67	1	1.47	0.83	0.91	0.78	0.85	0.74	1.81	0.4	1.13	0.71	1.54	0.62	1.1	0.86	1.55	0.49	1.36
KU143829	West Africa	Sierra Leone	2014	2014-2016|West African Epidemic	0.3729	0.2545	0.3975	0.2355	55.63	0.519	0.404	0.381	0.564	0.436	0.254	0.232	0.311	0.203	0.00651	-0.00209	1.02	0.98	1.32	1.07	1.15	0.64	0.88	0.94	1.43	0.91	0.66	1	1.47	0.83	0.91	0.78	0.85	0.74	1.81	0.4	1.13	0.71	1.54	0.62	1.11	0.84	1.55	0.5	1.36
KP759765	West Africa	Sierra Leone	2014	2014-2016|West African Epidemic	0.373	0.2546	0.3977	0.2352	55.64	0.52	0.404	0.38	0.564	0.436	0.254	0.232	0.311	0.203	0.00849	-4e-05	1.02	0.98	1.33	1.06	1.15	0.64	0.88	0.94	1.42	0.92	0.66	1	1.47	0.83	0.91	0.78	0.86	0.74	1.81	0.4	1.13	0.71	1.54	0.62	1.11	0.84	1.54	0.5	1.35
KY426690	West Africa	Sierra Leone	2015	2014-2016|West African Epidemic	0.3727	0.2546	0.3982	0.2348	55.6	0.519	0.404	0.38	0.565	0.435	0.254	0.232	0.311	0.203	0.00761	-0.00012	1.02	0.98	1.33	1.06	1.15	0.64	0.88	0.94	1.43	0.91	0.66	1	1.47	0.83	0.91	0.78	0.85	0.74	1.81	0.4	1.13	0.71	1.54	0.62	1.1	0.84	1.56	0.5	1.36
KY426721	West Africa	Sierra Leone	2015	2014-2016|West African Epidemic	0.3734	0.254	0.3972	0.2356	55.62	0.519	0.404	0.38	0.564	0.436	0.255	0.232	0.311	0.203	0.00566	0.00159	1.03	0.97	1.32	1.07	1.15	0.64	0.88	0.94	1.44	0.9	0.66	1	1.47	0.84	0.89	0.8	0.85	0.74	1.82	0.4	1.15	0.7	1.53	0.62	1.1	0.85	1.55	0.5	1.36
KU143787	West Africa	Sierra Leone	2014	2014-2016|West African Epidemic	0.3727	0.2544	0.3975	0.235	55.62	0.519	0.405	0.38	0.564	0.436	0.255	0.232	0.311	0.203	0.00853	-0.00109	1.02	0.98	1.32	1.07	1.15	0.64	0.88	0.94	1.42	0.92	0.66	1	1.47	0.83	0.92	0.78	0.85	0.74	1.8	0.4	1.13	0.71	1.54	0.62	1.11	0.84	1.54	0.5	1.35
KP759705	West Africa	Sierra Leone	2014	2014-2016|West African Epidemic	0.3728	0.2545	0.397	0.2356	55.63	0.519	0.404	0.381	0.564	0.436	0.255	0.232	0.311	0.203	0.00811	-0.00065	1.02	0.98	1.3	1.09	1.15	0.64	0.87	0.95	1.42	0.92	0.66	1	1.47	0.83	0.92	0.78	0.85	0.75	1.8	0.4	1.14	0.7	1.55	0.62	1.11	0.84	1.54	0.5	1.35
KR653286	West Africa	Sierra Leone	2014	2014-2016|West African Epidemic	0.3726	0.2548	0.3977	0.2352	55.63	0.519	0.404	0.381	0.564	0.436	0.254	0.232	0.311	0.203	0.00743	0.00239	1.02	0.98	1.32	1.07	1.15	0.64	0.88	0.94	1.43	0.91	0.66	1	1.47	0.83	0.91	0.78	0.85	0.74	1.81	0.4	1.15	0.69	1.54	0.62	1.11	0.84	1.55	0.5	1.36
KR653268	West Africa	Sierra Leone	2014	2014-2016|West African Epidemic	0.373	0.2546	0.3978	0.235	55.58	0.519	0.404	0.38	0.565	0.435	0.255	0.232	0.311	0.203	0.00694	-0.00061	1.02	0.98	1.32	1.07	1.15	0.64	0.88	0.94	1.43	0.91	0.66	1	1.47	0.83	0.91	0.78	0.85	0.74	1.81	0.4	1.13	0.71	1.54	0.62	1.1	0.85	1.56	0.49	1.36
KU296663	West Africa	Sierra Leone	2014	2014-2016|West African Epidemic	0.3729	0.2548	0.3975	0.2352	55.67	0.519	0.404	0.381	0.564	0.436	0.254	0.232	0.311	0.203	0.00835	-0.00043	1.02	0.98	1.32	1.07	1.15	0.64	0.88	0.94	1.43	0.91	0.66	1	1.47	0.83	0.91	0.78	0.85	0.76	1.77	0.42	1.13	0.71	1.54	0.62	1.11	0.84	1.56	0.49	1.35
MF599508	West Africa	Sierra Leone	2015	2014-2016|West African Epidemic	0.3729	0.2545	0.3977	0.2352	55.59	0.519	0.404	0.38	0.565	0.435	0.255	0.232	0.311	0.203	0.00721	0.00026	1.02	0.98	1.32	1.09	1.15	0.64	0.88	0.93	1.43	0.91	0.66	1	1.47	0.83	0.91	0.78	0.85	0.74	1.82	0.4	1.14	0.71	1.53	0.62	1.1	0.85	1.55	0.5	1.36
KU143785	West Africa	Sierra Leone	2014	2014-2016|West African Epidemic	0.3723	0.2547	0.398	0.2352	55.62	0.519	0.404	0.381	0.564	0.436	0.254	0.232	0.311	0.203	0.00727	-0.00058	1.02	0.98	1.32	1.07	1.15	0.64	0.88	0.94	1.41	0.91	0.68	1	1.47	0.83	0.91	0.78	0.85	0.74	1.81	0.4	1.13	0.71	1.54	0.62	1.12	0.84	1.54	0.5	1.35
KR105286	West Africa	Sierra Leone	2014	2014-2016|West African Epidemic	0.3734	0.254	0.3978	0.2352	55.6	0.519	0.404	0.38	0.564	0.436	0.254	0.232	0.311	0.203	0.00464	-1e-05	1.02	0.98	1.31	1.08	1.15	0.64	0.9	0.93	1.43	0.91	0.66	1	1.46	0.83	0.91	0.79	0.87	0.73	1.81	0.4	1.14	0.69	1.55	0.62	1.11	0.84	1.55	0.5	1.36
KR817151	West Africa	Guinea	2014	2014-2016|West African Epidemic	0.3725	0.2547	0.3977	0.2352	55.63	0.519	0.404	0.381	0.564	0.436	0.254	0.232	0.311	0.203	0.00621	-0.00066	1.02	0.98	1.31	1.07	1.14	0.64	0.89	0.94	1.43	0.91	0.66	1	1.47	0.83	0.91	0.78	0.86	0.74	1.8	0.42	1.15	0.69	1.54	0.62	1.11	0.84	1.56	0.49	1.36
KR817073	West Africa	Guinea	2014	2014-2016|West African Epidemic	0.3731	0.2543	0.3977	0.2352	55.58	0.519	0.404	0.38	0.564	0.436	0.255	0.232	0.311	0.203	0.00734	-0.00133	1.02	0.98	1.32	1.07	1.15	0.64	0.88	0.94	1.43	0.92	0.65	1	1.47	0.82	0.93	0.78	0.85	0.74	1.81	0.4	1.15	0.69	1.54	0.62	1.11	0.84	1.55	0.5	1.34
KY558986	West Africa	Liberia	2014	2014-2016|West African Epidemic	0.3734	0.2543	0.3974	0.2357	55.64	0.519	0.404	0.38	0.565	0.435	0.255	0.232	0.311	0.203	0.00702	0.00082	1.03	0.97	1.32	1.07	1.14	0.64	0.88	0.95	1.43	0.91	0.66	1	1.46	0.85	0.91	0.78	0.85	0.74	1.8	0.42	1.15	0.7	1.55	0.61	1.1	0.84	1.56	0.5	1.36
KT725371	West Africa	Liberia	2014	2014-2016|West African Epidemic	0.373	0.2541	0.3979	0.2354	55.61	0.519	0.404	0.38	0.564	0.436	0.254	0.232	0.311	0.203	0.0054	0.00084	1.02	0.98	1.32	1.07	1.15	0.64	0.88	0.94	1.44	0.9	0.66	1	1.46	0.83	0.91	0.8	0.85	0.74	1.81	0.4	1.15	0.69	1.54	0.62	1.11	0.84	1.55	0.5	1.36
KU220284	West Africa	Liberia	2015	2014-2016|West African Epidemic	0.3731	0.2545	0.398	0.2346	55.6	0.519	0.404	0.38	0.565	0.435	0.255	0.232	0.311	0.203	0.00757	-0.00018	1.02	0.98	1.32	1.06	1.15	0.64	0.88	0.94	1.42	0.92	0.66	1	1.47	0.83	0.91	0.78	0.85	0.74	1.8	0.42	1.15	0.7	1.55	0.61	1.11	0.84	1.55	0.5	1.36
KR817106	West Africa	Guinea	2015	2014-2016|West African Epidemic	0.3725	0.2543	0.3984	0.2349	55.56	0.519	0.405	0.38	0.564	0.436	0.254	0.232	0.311	0.203	0.00611	-0.00045	1.02	0.98	1.32	1.06	1.15	0.64	0.88	0.95	1.43	0.91	0.66	1	1.47	0.83	0.91	0.78	0.84	0.74	1.81	0.4	1.14	0.7	1.55	0.62	1.11	0.83	1.56	0.5	1.36
KX009893	West Africa	Liberia	2014	2014-2016|West African Epidemic	0.3736	0.2538	0.3975	0.2355	55.59	0.519	0.404	0.38	0.565	0.435	0.255	0.232	0.311	0.203	0.00619	0.00044	1.02	0.98	1.32	1.07	1.15	0.64	0.88	0.94	1.44	0.9	0.66	1	1.47	0.83	0.91	0.78	0.87	0.74	1.8	0.4	1.14	0.7	1.55	0.62	1.11	0.84	1.55	0.5	1.37
KR534588	West Africa	Guinea	2014	2014-2016|West African Epidemic	0.3734	0.2543	0.3976	0.2352	55.57	0.519	0.404	0.38	0.565	0.435	0.255	0.232	0.311	0.203	0.00704	-0.00032	1.02	0.98	1.32	1.07	1.15	0.64	0.88	0.94	1.43	0.92	0.65	1	1.47	0.83	0.91	0.78	0.86	0.74	1.81	0.4	1.15	0.69	1.54	0.62	1.11	0.84	1.55	0.5	1.36
KR534512	West Africa	Guinea	2014	2014-2016|West African Epidemic	0.3734	0.2543	0.3973	0.2355	55.59	0.519	0.404	0.38	0.564	0.436	0.255	0.232	0.311	0.203	0.00715	-0.00012	1.02	0.98	1.32	1.07	1.15	0.64	0.88	0.94	1.43	0.92	0.65	1	1.47	0.83	0.91	0.78	0.86	0.74	1.81	0.4	1.15	0.69	1.54	0.62	1.11	0.84	1.55	0.5	1.36
KR534518	West Africa	Guinea	2014	2014-2016|West African Epidemic	0.3734	0.2543	0.3973	0.2355	55.59	0.519	0.404	0.38	0.564	0.436	0.255	0.232	0.311	0.203	0.00715	-0.00012	1.02	0.98	1.32	1.07	1.15	0.64	0.88	0.94	1.43	0.92	0.65	1	1.47	0.83	0.91	0.78	0.86	0.74	1.81	0.4	1.15	0.69	1.54	0.62	1.11	0.84	1.55	0.5	1.36
KP260802	West Africa	Mali	2014	2014-2016|West African Epidemic	0.3736	0.254	0.398	0.2346	55.54	0.519	0.404	0.379	0.565	0.435	0.255	0.232	0.311	0.203	0.00708	-0.00069	1.03	0.97	1.32	1.07	1.15	0.64	0.88	0.94	1.43	0.92	0.65	1	1.47	0.83	0.91	0.78	0.85	0.76	1.81	0.4	1.15	0.69	1.55	0.6	1.11	0.84	1.56	0.49	1.36
KR817091	West Africa	Guinea	2014	2014-2016|West African Epidemic	0.3731	0.2545	0.3978	0.2349	55.54	0.519	0.404	0.38	0.565	0.435	0.255	0.232	0.311	0.203	0.0061	-0.00019	1.01	0.99	1.32	1.07	1.15	0.64	0.88	0.94	1.43	0.92	0.65	1	1.47	0.83	0.89	0.8	0.86	0.74	1.81	0.4	1.15	0.69	1.54	0.62	1.11	0.84	1.57	0.48	1.36
KR817148	West Africa	Guinea	2014	2014-2016|West African Epidemic	0.3734	0.2543	0.3973	0.2355	55.57	0.519	0.404	0.38	0.564	0.436	0.255	0.232	0.311	0.203	0.00702	-0.00024	1.02	0.98	1.32	1.07	1.15	0.64	0.88	0.94	1.43	0.92	0.65	1	1.47	0.83	0.91	0.78	0.86	0.74	1.81	0.4	1.15	0.69	1.54	0.62	1.11	0.84	1.55	0.5	1.36
KT725270	West Africa	Liberia	2014	2014-2016|West African Epidemic	0.3734	0.2543	0.3976	0.2352	55.55	0.519	0.404	0.38	0.565	0.435	0.255	0.232	0.311	0.203	0.00669	0.00053	1.01	0.99	1.32	1.07	1.15	0.64	0.88	0.94	1.43	0.92	0.65	1	1.47	0.83	0.91	0.78	0.86	0.74	1.81	0.4	1.16	0.68	1.54	0.62	1.11	0.84	1.56	0.49	1.36
KR817099	West Africa	Guinea	2015	2014-2016|West African Epidemic	0.3731	0.2543	0.3981	0.2349	55.53	0.519	0.404	0.38	0.565	0.435	0.255	0.232	0.311	0.203	0.00608	-0.00145	1.01	0.99	1.32	1.07	1.15	0.64	0.88	0.94	1.43	0.92	0.65	1	1.47	0.83	0.89	0.8	0.86	0.74	1.81	0.4	1.15	0.69	1.54	0.62	1.12	0.83	1.57	0.48	1.34
KR817138	West Africa	Guinea	2014	2014-2016|West African Epidemic	0.3734	0.2543	0.3973	0.2355	55.61	0.52	0.404	0.38	0.564	0.436	0.255	0.232	0.311	0.203	0.00726	-0.00031	1.02	0.98	1.32	1.07	1.15	0.64	0.88	0.94	1.43	0.92	0.65	1	1.47	0.84	0.91	0.78	0.86	0.74	1.81	0.4	1.15	0.69	1.52	0.63	1.11	0.84	1.55	0.5	1.36
KR534563	West Africa	Guinea	2014	2014-2016|West African Epidemic	0.3731	0.2545	0.3973	0.2355	55.6	0.519	0.404	0.381	0.564	0.436	0.255	0.232	0.311	0.203	0.00767	-0.00053	1.02	0.98	1.32	1.07	1.15	0.64	0.88	0.94	1.43	0.92	0.65	1	1.47	0.83	0.91	0.78	0.86	0.74	1.81	0.4	1.13	0.71	1.54	0.62	1.11	0.84	1.55	0.5	1.36
KX013096	West Africa	Nigeria	2014	2014-2016|West African Epidemic	0.3731	0.2545	0.3976	0.2352	55.59	0.519	0.404	0.38	0.564	0.436	0.255	0.232	0.311	0.203	0.0054	-0.00104	1.02	0.98	1.32	1.07	1.15	0.64	0.88	0.94	1.42	0.93	0.65	1	1.47	0.83	0.91	0.78	0.87	0.73	1.81	0.4	1.15	0.69	1.54	0.62	1.11	0.84	1.55	0.5	1.36
KX013094	West Africa	Nigeria	2014	2014-2016|West African Epidemic	0.3731	0.2545	0.3973	0.2355	55.61	0.519	0.404	0.381	0.564	0.436	0.254	0.232	0.311	0.203	0.00605	-0.00098	1.02	0.98	1.32	1.07	1.15	0.64	0.88	0.94	1.42	0.93	0.65	1	1.48	0.82	0.91	0.79	0.87	0.73	1.81	0.4	1.15	0.69	1.54	0.62	1.11	0.84	1.55	0.5	1.35
KR817168	West Africa	Guinea	2014	2014-2016|West African Epidemic	0.3734	0.2543	0.3973	0.2355	55.58	0.519	0.404	0.38	0.564	0.436	0.255	0.232	0.311	0.203	0.00684	-0.0003	1.02	0.98	1.32	1.07	1.15	0.64	0.88	0.94	1.43	0.92	0.65	1	1.47	0.83	0.91	0.78	0.86	0.74	1.81	0.4	1.15	0.69	1.54	0.62	1.11	0.84	1.55	0.5	1.36
KR817169	West Africa	Guinea	2014	2014-2016|West African Epidemic	0.3733	0.2545	0.3969	0.2358	55.61	0.519	0.404	0.381	0.564	0.436	0.255	0.232	0.311	0.203	0.00698	-0.00207	1.02	0.98	1.32	1.07	1.13	0.65	0.88	0.94	1.43	0.92	0.65	1	1.48	0.83	0.91	0.78	0.86	0.74	1.81	0.4	1.15	0.69	1.54	0.62	1.1	0.84	1.56	0.5	1.35
KX009899	West Africa	Liberia	2014	2014-2016|West African Epidemic	0.3733	0.2542	0.3976	0.2352	55.57	0.519	0.404	0.38	0.565	0.435	0.255	0.232	0.311	0.203	0.00737	0.00019	1.02	0.98	1.33	1.07	1.15	0.64	0.87	0.94	1.43	0.92	0.65	1	1.47	0.83	0.91	0.78	0.86	0.74	1.81	0.4	1.14	0.69	1.53	0.63	1.11	0.84	1.55	0.5	1.36
MH608087	West Africa	Sierra Leone	2015	2014-2016|West African Epidemic	0.3731	0.2543	0.3976	0.235	55.6	0.519	0.404	0.38	0.564	0.436	0.254	0.232	0.311	0.203	0.00559	0.00202	1.02	0.98	1.32	1.07	1.15	0.64	0.88	0.94	1.44	0.9	0.66	1	1.47	0.85	0.88	0.8	0.87	0.73	1.81	0.4	1.15	0.69	1.54	0.62	1.11	0.84	1.55	0.5	1.35
KR653283	West Africa	Sierra Leone	2014	2014-2016|West African Epidemic	0.3723	0.255	0.3975	0.2354	55.64	0.519	0.404	0.381	0.564	0.436	0.254	0.232	0.311	0.203	0.00699	-8e-05	1.02	0.98	1.32	1.07	1.15	0.64	0.88	0.94	1.42	0.93	0.65	1	1.48	0.83	0.91	0.77	0.85	0.74	1.81	0.4	1.13	0.71	1.54	0.62	1.1	0.84	1.55	0.51	1.35
KT357818	West Africa	Sierra Leone	2015	2014-2016|West African Epidemic	0.3731	0.2543	0.3976	0.2352	55.61	0.519	0.404	0.38	0.564	0.436	0.255	0.232	0.311	0.203	0.00698	-0.00098	1.03	0.97	1.32	1.07	1.15	0.64	0.88	0.94	1.42	0.92	0.66	1	1.48	0.83	0.91	0.77	0.85	0.74	1.8	0.4	1.13	0.71	1.54	0.62	1.11	0.83	1.56	0.5	1.36
KP759768	West Africa	Sierra Leone	2014	2014-2016|West African Epidemic	0.3725	0.2547	0.3977	0.2352	55.6	0.519	0.404	0.381	0.564	0.436	0.254	0.232	0.311	0.203	0.00811	0.0001	1.02	0.98	1.32	1.07	1.15	0.64	0.88	0.94	1.42	0.91	0.67	1	1.47	0.83	0.91	0.78	0.84	0.76	1.81	0.4	1.13	0.71	1.54	0.62	1.11	0.84	1.55	0.5	1.36
KT725342	West Africa	Liberia	2014	2014-2016|West African Epidemic	0.3725	0.2551	0.398	0.235	55.63	0.519	0.404	0.381	0.564	0.436	0.254	0.232	0.311	0.203	0.00722	0.00173	1.03	0.97	1.32	1.05	1.13	0.67	0.88	0.95	1.43	0.91	0.66	1	1.47	0.83	0.91	0.78	0.85	0.74	1.8	0.42	1.15	0.7	1.55	0.61	1.11	0.84	1.55	0.5	1.36
KR653236	West Africa	Sierra Leone	2014	2014-2016|West African Epidemic	0.3729	0.2545	0.398	0.2349	55.61	0.519	0.404	0.38	0.565	0.435	0.255	0.232	0.311	0.203	0.00651	-0.00018	1.02	0.98	1.32	1.07	1.13	0.64	0.88	0.95	1.43	0.91	0.66	1	1.46	0.83	0.93	0.78	0.87	0.74	1.81	0.39	1.13	0.71	1.54	0.62	1.11	0.84	1.55	0.5	1.36
KR817131	West Africa	Guinea	2014	2014-2016|West African Epidemic	0.3734	0.254	0.3977	0.2352	55.6	0.52	0.404	0.38	0.564	0.436	0.254	0.232	0.311	0.203	0.0058	-0.0005	1.02	0.98	1.29	1.07	1.15	0.64	0.91	0.94	1.43	0.91	0.66	1	1.47	0.83	0.91	0.78	0.85	0.74	1.81	0.4	1.15	0.69	1.54	0.62	1.11	0.84	1.55	0.5	1.36
KY007522	West Africa	Liberia	2016	2014-2016|West African Epidemic	0.3728	0.2545	0.3977	0.2352	55.59	0.519	0.404	0.38	0.564	0.436	0.254	0.232	0.311	0.203	0.00642	0.00151	1.03	0.97	1.32	1.06	1.13	0.65	0.88	0.95	1.43	0.91	0.66	1	1.47	0.83	0.91	0.78	0.84	0.76	1.81	0.4	1.16	0.68	1.54	0.62	1.11	0.84	1.55	0.5	1.36
KY007525	West Africa	Liberia	2016	2014-2016|West African Epidemic	0.3728	0.2545	0.3977	0.2351	55.6	0.519	0.404	0.38	0.564	0.436	0.254	0.232	0.311	0.203	0.00641	0.00099	1.03	0.97	1.32	1.06	1.13	0.65	0.88	0.95	1.42	0.92	0.66	1	1.47	0.83	0.91	0.78	0.84	0.76	1.81	0.4	1.16	0.68	1.54	0.62	1.12	0.84	1.55	0.5	1.36
KY401661	West Africa	Sierra Leone	2014	2014-2016|West African Epidemic	0.3731	0.2543	0.3978	0.2347	55.58	0.519	0.404	0.38	0.564	0.436	0.254	0.232	0.311	0.203	0.00687	-0.0021	1.02	0.98	1.31	1.08	1.16	0.64	0.88	0.93	1.43	0.91	0.66	1	1.47	0.83	0.91	0.78	0.86	0.73	1.81	0.4	1.13	0.71	1.54	0.62	1.12	0.84	1.55	0.5	1.35
KY401669	West Africa	Sierra Leone	2014	2014-2016|West African Epidemic	0.3729	0.2545	0.3978	0.2347	55.6	0.52	0.404	0.38	0.564	0.436	0.254	0.232	0.311	0.203	0.00737	-0.00186	1.02	0.98	1.31	1.08	1.16	0.64	0.88	0.93	1.43	0.91	0.66	1	1.47	0.83	0.91	0.78	0.86	0.73	1.82	0.41	1.13	0.71	1.54	0.62	1.12	0.84	1.55	0.5	1.34
KT357817	West Africa	Sierra Leone	2015	2014-2016|West African Epidemic	0.3731	0.2545	0.3972	0.2355	55.63	0.519	0.404	0.381	0.564	0.436	0.255	0.232	0.311	0.203	0.00783	-0.0006	1.02	0.98	1.32	1.07	1.15	0.64	0.88	0.94	1.42	0.92	0.66	1	1.47	0.83	0.91	0.78	0.85	0.74	1.81	0.4	1.14	0.71	1.53	0.62	1.11	0.84	1.54	0.5	1.36
KT357819	West Africa	Sierra Leone	2015	2014-2016|West African Epidemic	0.3734	0.2543	0.3975	0.2352	55.61	0.519	0.404	0.38	0.565	0.435	0.255	0.232	0.311	0.203	0.00776	-0.00057	1.02	0.98	1.32	1.07	1.15	0.64	0.88	0.94	1.43	0.91	0.66	1	1.47	0.83	0.91	0.78	0.85	0.74	1.81	0.4	1.14	0.71	1.53	0.62	1.11	0.84	1.55	0.5	1.37
KY401644	West Africa	Sierra Leone	2015	2014-2016|West African Epidemic	0.373	0.2545	0.3972	0.2355	55.62	0.52	0.404	0.381	0.564	0.436	0.255	0.232	0.311	0.203	0.00901	-0.00046	1.02	0.98	1.32	1.07	1.15	0.64	0.88	0.94	1.43	0.91	0.66	1	1.47	0.83	0.91	0.78	0.83	0.75	1.81	0.4	1.14	0.71	1.53	0.62	1.11	0.84	1.54	0.5	1.36
MF599522	West Africa	Sierra Leone	2015	2014-2016|West African Epidemic	0.3735	0.2541	0.3976	0.2351	55.61	0.519	0.404	0.38	0.565	0.435	0.255	0.232	0.311	0.203	0.00776	-0.0007	1.02	0.98	1.32	1.07	1.15	0.64	0.88	0.94	1.43	0.91	0.66	1	1.47	0.83	0.91	0.78	0.85	0.74	1.81	0.4	1.14	0.71	1.53	0.62	1.11	0.84	1.54	0.5	1.36
KY401652	West Africa	Sierra Leone	2015	2014-2016|West African Epidemic	0.3726	0.2548	0.3977	0.2352	55.61	0.519	0.404	0.381	0.564	0.436	0.254	0.232	0.311	0.203	0.00608	-0.00023	1.02	0.98	1.31	1.07	1.14	0.65	0.88	0.94	1.43	0.91	0.66	1	1.47	0.83	0.91	0.78	0.85	0.74	1.81	0.4	1.15	0.68	1.55	0.62	1.11	0.84	1.55	0.5	1.36
KP759615	West Africa	Sierra Leone	2014	2014-2016|West African Epidemic	0.3729	0.2543	0.398	0.2352	55.6	0.52	0.404	0.38	0.564	0.436	0.254	0.232	0.311	0.203	0.00677	-0.002	1.02	0.98	1.32	1.07	1.15	0.64	0.88	0.94	1.42	0.91	0.67	1	1.47	0.83	0.91	0.78	0.85	0.74	1.81	0.4	1.13	0.71	1.54	0.62	1.1	0.84	1.56	0.5	1.36
KP759612	West Africa	Sierra Leone	2014	2014-2016|West African Epidemic	0.3729	0.2545	0.398	0.2349	55.61	0.519	0.404	0.38	0.564	0.436	0.254	0.232	0.311	0.203	0.00735	-0.00042	1.02	0.98	1.32	1.07	1.15	0.64	0.88	0.94	1.43	0.91	0.66	1	1.48	0.83	0.91	0.77	0.85	0.74	1.8	0.4	1.13	0.71	1.54	0.62	1.1	0.84	1.56	0.5	1.36
KP759654	West Africa	Sierra Leone	2014	2014-2016|West African Epidemic	0.373	0.2542	0.3976	0.2351	55.6	0.519	0.404	0.38	0.564	0.436	0.254	0.232	0.311	0.203	0.00762	-0.00057	1.02	0.98	1.31	1.07	1.17	0.63	0.88	0.94	1.43	0.91	0.66	1	1.47	0.83	0.91	0.78	0.85	0.74	1.81	0.4	1.13	0.71	1.54	0.62	1.1	0.84	1.56	0.5	1.36
KY401648	West Africa	Sierra Leone	2015	2014-2016|West African Epidemic	0.3726	0.2548	0.3979	0.2352	55.63	0.518	0.404	0.38	0.565	0.435	0.254	0.232	0.311	0.203	0.00883	0.00111	1.02	0.98	1.32	1.06	1.15	0.65	0.88	0.94	1.42	0.91	0.67	1	1.47	0.83	0.91	0.8	0.85	0.74	1.81	0.4	1.15	0.68	1.55	0.62	1.11	0.85	1.54	0.5	1.33
KX121193	West Africa	Sierra Leone	2016	2014-2016|West African Epidemic	0.3725	0.2544	0.398	0.2356	55.62	0.519	0.404	0.38	0.564	0.436	0.254	0.232	0.311	0.203	0.00752	-0.00163	1.02	0.98	1.3	1.07	1.15	0.64	0.89	0.94	1.43	0.91	0.66	1	1.47	0.83	0.91	0.78	0.84	0.76	1.81	0.4	1.12	0.71	1.54	0.63	1.11	0.83	1.56	0.5	1.36
KX121194	West Africa	Sierra Leone	2016	2014-2016|West African Epidemic	0.3727	0.2543	0.3978	0.2355	55.62	0.519	0.404	0.38	0.564	0.436	0.254	0.232	0.311	0.203	0.00769	-0.00137	1.02	0.98	1.3	1.07	1.15	0.64	0.89	0.94	1.43	0.91	0.66	1	1.47	0.83	0.91	0.78	0.84	0.76	1.81	0.4	1.12	0.71	1.54	0.63	1.11	0.83	1.56	0.5	1.36
KU143809	West Africa	Sierra Leone	2014	2014-2016|West African Epidemic	0.3725	0.2545	0.3975	0.2353	55.62	0.519	0.404	0.381	0.564	0.436	0.255	0.232	0.311	0.203	0.0075	-0.0008	1.02	0.98	1.31	1.08	1.14	0.64	0.88	0.95	1.43	0.91	0.66	1	1.47	0.83	0.91	0.78	0.85	0.74	1.81	0.4	1.13	0.71	1.54	0.62	1.1	0.84	1.56	0.5	1.36
KT725302	West Africa	Liberia	2014	2014-2016|West African Epidemic	0.3734	0.2543	0.3976	0.2353	55.56	0.519	0.404	0.38	0.565	0.435	0.255	0.232	0.311	0.203	0.00884	-0.0019	1.02	0.98	1.32	1.07	1.15	0.64	0.88	0.94	1.42	0.93	0.65	1	1.48	0.82	0.91	0.79	0.85	0.76	1.81	0.4	1.15	0.69	1.54	0.62	1.1	0.84	1.56	0.5	1.36
KX009903	West Africa	Liberia	2014	2014-2016|West African Epidemic	0.3726	0.255	0.3975	0.2352	55.64	0.519	0.404	0.381	0.564	0.436	0.254	0.232	0.311	0.203	0.00764	0.00219	1.02	0.98	1.32	1.07	1.15	0.64	0.88	0.94	1.43	0.91	0.66	1	1.47	0.83	0.91	0.78	0.85	0.74	1.81	0.4	1.15	0.69	1.54	0.62	1.11	0.84	1.55	0.5	1.36
KT357820	West Africa	Sierra Leone	2015	2014-2016|West African Epidemic	0.3729	0.2541	0.3982	0.2349	55.55	0.519	0.404	0.38	0.565	0.435	0.255	0.232	0.311	0.203	0.00613	0.00042	1.02	0.98	1.32	1.07	1.15	0.64	0.88	0.94	1.42	0.91	0.67	1	1.47	0.83	0.91	0.78	0.85	0.74	1.81	0.4	1.13	0.71	1.54	0.62	1.11	0.84	1.57	0.48	1.36
KY426707	West Africa	Sierra Leone	2015	2014-2016|West African Epidemic	0.373	0.2545	0.3968	0.2357	55.65	0.519	0.404	0.381	0.564	0.436	0.254	0.232	0.311	0.203	0.00599	0.00049	1.02	0.98	1.31	1.06	1.16	0.64	0.88	0.95	1.44	0.89	0.67	1	1.47	0.84	0.91	0.78	0.85	0.74	1.81	0.4	1.12	0.72	1.54	0.62	1.11	0.84	1.54	0.5	1.36
KU143834	West Africa	Sierra Leone	2014	2014-2016|West African Epidemic	0.3726	0.255	0.3977	0.2349	55.64	0.519	0.404	0.381	0.564	0.436	0.254	0.232	0.311	0.203	0.00677	0.00089	1.02	0.98	1.32	1.06	1.13	0.66	0.88	0.94	1.44	0.9	0.66	1	1.47	0.83	0.91	0.78	0.86	0.74	1.8	0.4	1.13	0.71	1.54	0.62	1.1	0.84	1.56	0.5	1.36
MF599510	West Africa	Sierra Leone	2015	2014-2016|West African Epidemic	0.3719	0.2555	0.3976	0.2352	55.63	0.519	0.404	0.381	0.564	0.436	0.254	0.232	0.311	0.203	0.00883	-0.00092	1.01	0.99	1.32	1.05	1.16	0.63	0.89	0.95	1.43	0.91	0.66	1	1.48	0.83	0.91	0.78	0.84	0.74	1.81	0.4	1.12	0.72	1.54	0.62	1.1	0.85	1.55	0.5	1.36
KR817084	West Africa	Guinea	2014	2014-2016|West African Epidemic	0.3725	0.2543	0.398	0.2355	55.6	0.519	0.404	0.38	0.565	0.435	0.255	0.232	0.311	0.203	0.00944	-0.00086	1.02	0.98	1.32	1.07	1.15	0.64	0.88	0.94	1.43	0.91	0.66	1	1.47	0.83	0.91	0.78	0.84	0.74	1.81	0.4	1.14	0.7	1.55	0.62	1.11	0.83	1.56	0.5	1.36
KR075001	West Africa	Liberia	2014	2014-2016|West African Epidemic	0.374	0.2534	0.398	0.2349	55.57	0.518	0.404	0.379	0.565	0.435	0.255	0.231	0.311	0.202	0.00893	-0.00055	1.02	0.98	1.31	1.07	1.14	0.64	0.89	0.94	1.43	0.91	0.66	1	1.49	0.82	0.91	0.78	0.85	0.75	1.8	0.42	1.16	0.7	1.54	0.61	1.12	0.84	1.56	0.49	1.34
KR105247	West Africa	Sierra Leone	2014	2014-2016|West African Epidemic	0.3721	0.2555	0.3975	0.2352	55.62	0.519	0.404	0.381	0.564	0.436	0.254	0.232	0.311	0.203	0.0056	0.00101	1.01	0.99	1.32	1.07	1.15	0.65	0.87	0.94	1.43	0.91	0.66	1	1.47	0.83	0.91	0.78	0.85	0.74	1.81	0.4	1.15	0.69	1.54	0.62	1.1	0.85	1.55	0.5	1.36
MH470380	West Africa	Guinea	2015	2014-2016|West African Epidemic	0.3719	0.2551	0.3982	0.235	55.61	0.519	0.404	0.381	0.564	0.436	0.254	0.232	0.311	0.203	0.00472	0.00291	1.02	0.98	1.32	1.07	1.15	0.64	0.88	0.94	1.43	0.91	0.66	1	1.47	0.83	0.91	0.78	0.85	0.74	1.82	0.39	1.13	0.69	1.55	0.62	1.09	0.86	1.55	0.5	1.34
KR534591	West Africa	Guinea	2014	2014-2016|West African Epidemic	0.3739	0.2532	0.398	0.2356	55.6	0.519	0.404	0.379	0.565	0.435	0.255	0.231	0.311	0.203	0.00608	-0.00058	1.04	0.96	1.32	1.08	1.14	0.64	0.88	0.94	1.42	0.92	0.66	1	1.48	0.83	0.91	0.77	0.87	0.72	1.82	0.4	1.15	0.68	1.55	0.62	1.11	0.84	1.55	0.5	1.34
KR534572	West Africa	Guinea	2014	2014-2016|West African Epidemic	0.3736	0.2532	0.3982	0.2356	55.6	0.519	0.404	0.379	0.565	0.435	0.255	0.231	0.311	0.203	0.0061	-0.00074	1.04	0.96	1.32	1.08	1.14	0.64	0.88	0.94	1.42	0.92	0.66	1	1.48	0.83	0.91	0.77	0.87	0.72	1.82	0.4	1.15	0.68	1.55	0.62	1.11	0.84	1.55	0.5	1.32
KX121419	West Africa	Guinea	2014	2014-2016|West African Epidemic	0.3739	0.2532	0.398	0.2356	55.6	0.519	0.404	0.379	0.565	0.435	0.255	0.231	0.311	0.203	0.00582	-0.00117	1.04	0.96	1.32	1.08	1.14	0.64	0.88	0.94	1.42	0.92	0.66	1	1.48	0.83	0.91	0.77	0.87	0.72	1.81	0.4	1.15	0.68	1.55	0.62	1.11	0.84	1.55	0.5	1.34
MG572230	West Africa	Guinea	2014	2014-2016|West African Epidemic	0.3734	0.2538	0.3977	0.2355	55.62	0.519	0.404	0.38	0.565	0.435	0.254	0.232	0.311	0.203	0.00755	0.00234	1.03	0.97	1.32	1.07	1.15	0.64	0.88	0.94	1.43	0.91	0.66	1	1.48	0.83	0.91	0.77	0.85	0.74	1.81	0.4	1.15	0.68	1.55	0.62	1.11	0.84	1.55	0.5	1.35
KX000400	West Africa	Guinea	2014	2014-2016|West African Epidemic	0.3737	0.2531	0.3982	0.2352	55.59	0.519	0.404	0.379	0.565	0.435	0.255	0.231	0.311	0.203	0.00896	0.00078	1.03	0.97	1.32	1.07	1.15	0.64	0.89	0.93	1.42	0.91	0.67	1	1.48	0.83	0.93	0.76	0.85	0.74	1.81	0.4	1.15	0.68	1.55	0.62	1.11	0.84	1.54	0.5	1.35
KT013258	West Africa	Guinea	2014	2014-2016|West African Epidemic	0.3736	0.2532	0.3975	0.2357	55.64	0.519	0.404	0.38	0.564	0.436	0.255	0.232	0.311	0.203	0.00645	0.00167	1.03	0.97	1.32	1.07	1.15	0.64	0.88	0.94	1.42	0.91	0.67	1	1.48	0.83	0.91	0.77	0.85	0.74	1.81	0.4	1.15	0.66	1.55	0.63	1.11	0.84	1.54	0.5	1.35
KR817233	West Africa	Liberia	2014	2014-2016|West African Epidemic	0.3734	0.2538	0.3979	0.2351	55.61	0.519	0.404	0.38	0.565	0.435	0.255	0.232	0.311	0.203	0.0063	0.00062	1.03	0.97	1.32	1.07	1.15	0.64	0.89	0.93	1.43	0.91	0.66	1	1.47	0.83	0.91	0.78	0.85	0.74	1.81	0.4	1.15	0.68	1.55	0.62	1.11	0.84	1.55	0.5	1.36
KR817193	West Africa	Guinea	2014	2014-2016|West African Epidemic	0.3739	0.2532	0.3978	0.2355	55.6	0.519	0.404	0.379	0.565	0.435	0.255	0.232	0.311	0.203	0.00752	0.00112	1.04	0.96	1.32	1.08	1.14	0.64	0.88	0.94	1.43	0.91	0.66	1	1.48	0.83	0.91	0.77	0.85	0.74	1.81	0.4	1.15	0.68	1.55	0.62	1.11	0.84	1.55	0.5	1.35
KR817207	West Africa	Guinea	2014	2014-2016|West African Epidemic	0.3739	0.2532	0.3978	0.2355	55.59	0.519	0.404	0.379	0.565	0.435	0.255	0.232	0.311	0.203	0.00974	0.00105	1.04	0.96	1.32	1.08	1.14	0.64	0.88	0.94	1.43	0.91	0.66	1	1.5	0.82	0.91	0.77	0.85	0.74	1.81	0.4	1.15	0.68	1.55	0.62	1.11	0.84	1.55	0.5	1.35
KR817183	West Africa	Guinea	2014	2014-2016|West African Epidemic	0.3736	0.2532	0.3984	0.2352	55.59	0.519	0.404	0.379	0.565	0.435	0.255	0.232	0.311	0.203	0.00673	0.00147	1.04	0.96	1.32	1.08	1.14	0.64	0.9	0.93	1.43	0.91	0.66	1	1.48	0.83	0.91	0.77	0.85	0.74	1.81	0.4	1.15	0.68	1.55	0.62	1.1	0.84	1.56	0.5	1.35
KR817223	West Africa	Guinea	2014	2014-2016|West African Epidemic	0.3736	0.2535	0.3972	0.2361	55.61	0.519	0.404	0.38	0.564	0.436	0.255	0.232	0.311	0.203	0.00848	0.00084	1.03	0.97	1.31	1.08	1.14	0.64	0.87	0.95	1.43	0.91	0.66	1	1.48	0.83	0.91	0.77	0.86	0.74	1.8	0.4	1.15	0.68	1.55	0.62	1.11	0.84	1.55	0.5	1.35
KR817080	West Africa	Guinea	2014	2014-2016|West African Epidemic	0.3735	0.2534	0.3976	0.2354	55.61	0.519	0.404	0.38	0.564	0.436	0.255	0.232	0.311	0.203	0.00946	-0.001	1.03	0.97	1.32	1.07	1.15	0.64	0.88	0.94	1.43	0.91	0.66	1	1.49	0.82	0.91	0.78	0.84	0.76	1.81	0.4	1.15	0.68	1.55	0.62	1.11	0.84	1.55	0.5	1.37
KU978801	West Africa	Guinea	2014	2014-2016|West African Epidemic	0.3739	0.2532	0.3978	0.2355	55.6	0.519	0.404	0.379	0.565	0.435	0.255	0.232	0.311	0.203	0.00632	0.00087	1.04	0.96	1.32	1.08	1.14	0.64	0.88	0.94	1.42	0.92	0.66	1	1.48	0.83	0.91	0.77	0.87	0.73	1.81	0.4	1.15	0.68	1.55	0.62	1.11	0.84	1.55	0.5	1.35
MH470376	West Africa	Guinea	2015	2014-2016|West African Epidemic	0.3736	0.2539	0.3982	0.235	55.57	0.519	0.404	0.38	0.565	0.435	0.255	0.232	0.311	0.202	0.00783	0.00036	1.04	0.96	1.32	1.08	1.14	0.64	0.88	0.94	1.42	0.92	0.66	1	1.49	0.84	0.92	0.76	0.85	0.74	1.81	0.4	1.15	0.68	1.55	0.62	1.11	0.84	1.56	0.49	1.34
MF102255	West Africa	Guinea	2015	2014-2016|West African Epidemic	0.3737	0.2531	0.3977	0.2355	55.57	0.519	0.404	0.379	0.565	0.435	0.255	0.232	0.311	0.203	0.00754	0.0016	1.03	0.97	1.31	1.07	1.14	0.64	0.88	0.95	1.43	0.91	0.66	1	1.48	0.83	0.91	0.77	0.85	0.74	1.81	0.4	1.15	0.68	1.55	0.62	1.11	0.84	1.55	0.5	1.35
KU296540	West Africa	Sierra Leone	2015	2014-2016|West African Epidemic	0.3727	0.2545	0.3982	0.2352	55.59	0.519	0.404	0.38	0.564	0.436	0.254	0.232	0.311	0.203	0.00752	0.00045	1.02	0.98	1.32	1.06	1.15	0.64	0.88	0.95	1.44	0.9	0.66	1	1.47	0.83	0.91	0.78	0.85	0.74	1.81	0.4	1.14	0.7	1.54	0.62	1.1	0.84	1.56	0.5	1.36
KU296346	West Africa	Sierra Leone	2015	2014-2016|West African Epidemic	0.3732	0.2543	0.3975	0.2354	55.61	0.519	0.404	0.38	0.564	0.436	0.255	0.232	0.311	0.203	0.00668	-0.00061	1.02	0.98	1.32	1.07	1.15	0.64	0.88	0.94	1.43	0.91	0.66	1	1.47	0.83	0.91	0.78	0.85	0.74	1.81	0.4	1.14	0.7	1.54	0.62	1.11	0.84	1.54	0.5	1.36
KU296563	West Africa	Sierra Leone	2015	2014-2016|West African Epidemic	0.3728	0.2546	0.3974	0.2357	55.59	0.519	0.404	0.381	0.564	0.436	0.255	0.232	0.311	0.203	0.00752	0.0004	1.03	0.97	1.3	1.09	1.15	0.64	0.87	0.95	1.42	0.91	0.67	1	1.47	0.84	0.91	0.78	0.83	0.75	1.81	0.4	1.14	0.7	1.55	0.62	1.1	0.85	1.55	0.5	1.36
KU296839	West Africa	Sierra Leone	2015	2014-2016|West African Epidemic	0.3729	0.2545	0.3977	0.2352	55.63	0.519	0.404	0.38	0.564	0.436	0.254	0.232	0.311	0.203	0.00801	-0.00033	1.02	0.98	1.32	1.07	1.15	0.64	0.88	0.94	1.42	0.92	0.66	1	1.47	0.83	0.93	0.77	0.85	0.74	1.81	0.4	1.13	0.71	1.54	0.62	1.11	0.84	1.55	0.5	1.36
KY401656	West Africa	Sierra Leone	2015	2014-2016|West African Epidemic	0.3726	0.255	0.3973	0.2353	55.65	0.519	0.404	0.381	0.564	0.436	0.254	0.232	0.311	0.203	0.00504	-0.0011	1.02	0.98	1.31	1.08	1.14	0.65	0.88	0.94	1.44	0.91	0.65	1	1.46	0.83	0.91	0.8	0.85	0.74	1.81	0.4	1.13	0.71	1.54	0.62	1.11	0.84	1.55	0.5	1.36
KR653230	West Africa	Sierra Leone	2014	2014-2016|West African Epidemic	0.3719	0.2556	0.3975	0.2353	55.69	0.519	0.405	0.381	0.564	0.436	0.254	0.233	0.311	0.203	0.00712	0.00201	1.02	0.98	1.29	1.08	1.15	0.64	0.9	0.94	1.42	0.92	0.66	1	1.48	0.83	0.9	0.79	0.85	0.74	1.81	0.4	1.13	0.71	1.55	0.62	1.11	0.85	1.54	0.51	1.36
KU296791	West Africa	Sierra Leone	2015	2014-2016|West African Epidemic	0.3722	0.2546	0.3977	0.2359	55.62	0.519	0.403	0.381	0.564	0.436	0.254	0.232	0.311	0.203	0.00645	0.00091	1.02	0.98	1.32	1.06	1.14	0.65	0.88	0.95	1.43	0.91	0.66	1	1.46	0.83	0.91	0.8	0.86	0.74	1.8	0.4	1.14	0.7	1.55	0.62	1.1	0.84	1.56	0.5	1.36
KP759683	West Africa	Sierra Leone	2014	2014-2016|West African Epidemic	0.3734	0.254	0.3972	0.2357	55.6	0.519	0.404	0.38	0.564	0.436	0.255	0.232	0.311	0.203	0.0068	-0.0007	1.02	0.98	1.32	1.07	1.15	0.64	0.88	0.94	1.44	0.9	0.66	1	1.47	0.84	0.89	0.8	0.85	0.74	1.81	0.4	1.15	0.69	1.54	0.62	1.1	0.84	1.54	0.52	1.36
KP759699	West Africa	Sierra Leone	2014	2014-2016|West African Epidemic	0.3726	0.2548	0.3969	0.236	55.63	0.52	0.404	0.381	0.564	0.436	0.254	0.232	0.311	0.203	0.0056	0.00034	1.02	0.98	1.32	1.07	1.13	0.65	0.88	0.94	1.45	0.89	0.66	1	1.47	0.84	0.89	0.8	0.85	0.74	1.81	0.4	1.12	0.72	1.54	0.62	1.11	0.84	1.55	0.5	1.36
KY426718	West Africa	Sierra Leone	2015	2014-2016|West African Epidemic	0.3726	0.2548	0.3983	0.2346	55.62	0.519	0.404	0.38	0.564	0.436	0.254	0.232	0.311	0.203	0.00653	-0.00045	1.02	0.98	1.3	1.07	1.15	0.64	0.89	0.94	1.43	0.91	0.66	1	1.47	0.83	0.91	0.78	0.85	0.74	1.81	0.4	1.13	0.71	1.54	0.62	1.11	0.84	1.55	0.5	1.36
MF599514	West Africa	Sierra Leone	2015	2014-2016|West African Epidemic	0.3728	0.2546	0.3978	0.2351	55.63	0.519	0.405	0.38	0.564	0.436	0.254	0.232	0.311	0.203	0.00461	-0.0016	1.04	0.96	1.31	1.08	1.14	0.64	0.9	0.94	1.43	0.91	0.66	1	1.47	0.85	0.89	0.78	0.85	0.74	1.81	0.4	1.12	0.72	1.54	0.62	1.11	0.84	1.55	0.5	1.36
MF599504	West Africa	Sierra Leone	2015	2014-2016|West African Epidemic	0.3729	0.2545	0.3977	0.2352	55.63	0.519	0.404	0.38	0.564	0.436	0.254	0.232	0.311	0.203	0.00512	-0.00129	1.04	0.96	1.3	1.07	1.15	0.64	0.89	0.94	1.43	0.91	0.66	1	1.47	0.84	0.91	0.78	0.85	0.74	1.81	0.4	1.12	0.72	1.54	0.62	1.11	0.84	1.55	0.5	1.36
KU296370	West Africa	Sierra Leone	2015	2014-2016|West African Epidemic	0.3732	0.2545	0.3982	0.2343	55.6	0.52	0.405	0.38	0.564	0.436	0.254	0.232	0.311	0.203	0.0039	-0.001	1.04	0.96	1.31	1.08	1.15	0.64	0.9	0.93	1.44	0.9	0.66	1	1.46	0.86	0.9	0.78	0.86	0.74	1.81	0.39	1.12	0.72	1.54	0.62	1.11	0.84	1.55	0.5	1.36
KU296585	West Africa	Sierra Leone	2015	2014-2016|West African Epidemic	0.3727	0.2548	0.398	0.2349	55.63	0.519	0.405	0.38	0.564	0.436	0.254	0.232	0.311	0.203	0.00316	-0.00049	1.04	0.96	1.31	1.08	1.15	0.64	0.9	0.93	1.43	0.91	0.66	1	1.47	0.86	0.89	0.78	0.85	0.74	1.81	0.4	1.12	0.71	1.55	0.62	1.1	0.84	1.56	0.5	1.36
KU296319	West Africa	Sierra Leone	2015	2014-2016|West African Epidemic	0.373	0.2548	0.3982	0.2343	55.63	0.519	0.405	0.38	0.564	0.436	0.254	0.232	0.311	0.203	0.00522	-0.00019	1.04	0.96	1.31	1.08	1.15	0.64	0.9	0.93	1.43	0.91	0.66	1	1.47	0.86	0.91	0.77	0.85	0.74	1.81	0.4	1.12	0.72	1.54	0.62	1.11	0.84	1.55	0.5	1.36
KU296614	West Africa	Sierra Leone	2015	2014-2016|West African Epidemic	0.3732	0.254	0.398	0.2353	55.6	0.519	0.404	0.38	0.565	0.435	0.255	0.231	0.311	0.202	0.00585	0.0004	1.03	0.97	1.33	1.06	1.14	0.64	0.88	0.95	1.43	0.91	0.66	1	1.47	0.83	0.92	0.78	0.85	0.74	1.81	0.4	1.16	0.68	1.55	0.61	1.11	0.84	1.55	0.5	1.36
KU296345	West Africa	Sierra Leone	2015	2014-2016|West African Epidemic	0.3731	0.2539	0.3977	0.2359	55.61	0.519	0.404	0.38	0.564	0.436	0.255	0.232	0.311	0.203	0.00717	-0.00152	1.02	0.98	1.32	1.06	1.15	0.64	0.87	0.96	1.43	0.91	0.66	1	1.46	0.83	0.93	0.78	0.87	0.72	1.8	0.42	1.15	0.68	1.56	0.61	1.11	0.83	1.56	0.5	1.36
KT765131	West Africa	Guinea	2014	2014-2016|West African Epidemic	0.3736	0.2538	0.3978	0.2352	55.55	0.519	0.404	0.38	0.565	0.435	0.255	0.232	0.311	0.203	0.00802	0.00031	1.02	0.98	1.31	1.07	1.14	0.65	0.88	0.94	1.43	0.91	0.66	1	1.47	0.83	0.91	0.78	0.86	0.74	1.81	0.4	1.16	0.68	1.54	0.62	1.11	0.84	1.55	0.5	1.36
MH608027	West Africa	Sierra Leone	2014	2014-2016|West African Epidemic	0.3733	0.2539	0.3972	0.2357	55.61	0.519	0.404	0.38	0.564	0.436	0.255	0.232	0.311	0.203	0.0064	0.0001	1.02	0.98	1.32	1.07	1.15	0.64	0.88	0.94	1.44	0.9	0.66	1	1.47	0.84	0.89	0.8	0.85	0.74	1.81	0.4	1.15	0.69	1.54	0.62	1.1	0.84	1.55	0.51	1.36
KU296489	West Africa	Sierra Leone	2015	2014-2016|West African Epidemic	0.3731	0.254	0.3971	0.2359	55.57	0.519	0.405	0.38	0.564	0.436	0.255	0.232	0.311	0.203	0.00481	0.00092	1.02	0.98	1.32	1.07	1.15	0.64	0.88	0.94	1.44	0.9	0.66	1	1.47	0.85	0.88	0.8	0.85	0.74	1.81	0.4	1.15	0.68	1.55	0.62	1.1	0.84	1.55	0.51	1.36
KU296798	West Africa	Sierra Leone	2015	2014-2016|West African Epidemic	0.3732	0.2543	0.3971	0.2355	55.61	0.519	0.404	0.38	0.564	0.436	0.255	0.232	0.311	0.203	0.00567	-0.00018	1.02	0.98	1.32	1.07	1.15	0.64	0.88	0.94	1.44	0.91	0.65	1	1.47	0.84	0.89	0.8	0.86	0.74	1.8	0.4	1.15	0.68	1.55	0.62	1.1	0.84	1.55	0.51	1.36
KT725358	West Africa	Liberia	2014	2014-2016|West African Epidemic	0.3725	0.255	0.3968	0.236	55.68	0.519	0.404	0.381	0.564	0.436	0.254	0.232	0.311	0.203	0.00687	-0.00134	1.03	0.97	1.31	1.09	1.14	0.65	0.87	0.94	1.43	0.91	0.66	1	1.47	0.83	0.91	0.8	0.85	0.74	1.81	0.4	1.15	0.69	1.54	0.62	1.11	0.84	1.54	0.51	1.36
KR817241	West Africa	Liberia	2014	2014-2016|West African Epidemic	0.373	0.2534	0.3978	0.2351	55.6	0.52	0.405	0.38	0.564	0.436	0.254	0.232	0.311	0.203	0.00598	0.00188	1.04	0.96	1.31	1.07	1.14	0.65	0.89	0.93	1.42	0.92	0.66	1	1.48	0.83	0.91	0.78	0.85	0.74	1.81	0.4	1.14	0.69	1.53	0.63	1.09	0.85	1.56	0.5	1.36
KU143789	West Africa	Sierra Leone	2014	2014-2016|West African Epidemic	0.373	0.255	0.3981	0.2339	55.59	0.519	0.404	0.38	0.565	0.435	0.254	0.232	0.311	0.202	0.00536	0.00138	1.04	0.96	1.32	1.07	1.15	0.64	0.88	0.94	1.42	0.92	0.66	1	1.46	0.86	0.9	0.78	0.85	0.74	1.8	0.4	1.15	0.69	1.54	0.62	1.11	0.83	1.56	0.5	1.39
KU296481	West Africa	Sierra Leone	2015	2014-2016|West African Epidemic	0.374	0.2528	0.398	0.2359	55.6	0.519	0.404	0.379	0.565	0.435	0.255	0.231	0.311	0.203	0.00644	-0.00049	1.05	0.95	1.32	1.08	1.14	0.64	0.88	0.94	1.41	0.92	0.67	1	1.48	0.83	0.91	0.77	0.87	0.72	1.82	0.4	1.16	0.67	1.55	0.62	1.1	0.85	1.55	0.5	1.34
KR817113	West Africa	Guinea	2014	2014-2016|West African Epidemic	0.3735	0.2532	0.397	0.2368	55.65	0.519	0.404	0.38	0.564	0.436	0.254	0.232	0.311	0.203	0.00966	-0.00079	1.03	0.97	1.32	1.09	1.15	0.64	0.86	0.94	1.42	0.91	0.67	1	1.48	0.83	0.91	0.77	0.86	0.74	1.8	0.4	1.14	0.68	1.56	0.62	1.11	0.84	1.54	0.5	1.36
KY425636	Central Africa	Democratic Republic of the Congo	1995	1995|Democratic Republic of the Congo	0.375	0.2534	0.4006	0.231	55.17	0.519	0.405	0.376	0.565	0.435	0.255	0.232	0.312	0.201	-0.041	0.01206	1.08	0.92	1.3	1.08	1.13	0.64	0.95	0.89	1.45	0.93	0.61	1	1.44	0.89	0.85	0.82	0.95	0.66	1.85	0.32	1.2	0.61	1.56	0.63	1.06	0.89	1.6	0.45	1.39
KR063672	Central Africa	Democratic Republic of the Congo	1995	1995|Democratic Republic of the Congo	0.375	0.2534	0.4006	0.231	55.17	0.519	0.405	0.376	0.565	0.435	0.255	0.232	0.312	0.201	-0.041	0.01206	1.08	0.92	1.3	1.08	1.13	0.64	0.95	0.89	1.45	0.93	0.61	1	1.44	0.89	0.85	0.82	0.95	0.66	1.85	0.32	1.2	0.61	1.56	0.63	1.06	0.89	1.6	0.45	1.39
KU182899	Central Africa	Democratic Republic of the Congo	1995	1995|Democratic Republic of the Congo	0.375	0.2534	0.4006	0.2311	55.18	0.519	0.405	0.376	0.566	0.434	0.255	0.232	0.312	0.201	-0.04072	0.01214	1.08	0.92	1.3	1.08	1.13	0.64	0.95	0.89	1.45	0.93	0.62	1	1.44	0.89	0.85	0.82	0.95	0.66	1.85	0.32	1.2	0.61	1.56	0.63	1.07	0.89	1.59	0.46	1.39
KC242796	Central Africa	Democratic Republic of the Congo	1995	1995|Democratic Republic of the Congo	0.3745	0.2534	0.4008	0.2313	55.2	0.52	0.405	0.377	0.565	0.435	0.254	0.232	0.312	0.202	-0.03987	0.01184	1.08	0.92	1.3	1.08	1.13	0.64	0.95	0.89	1.45	0.93	0.61	1	1.44	0.89	0.85	0.82	0.95	0.66	1.85	0.32	1.2	0.61	1.56	0.63	1.06	0.89	1.6	0.45	1.38
KY425653	Central Africa	Democratic Republic of the Congo	1995	1995|Democratic Republic of the Congo	0.3747	0.2534	0.4005	0.2313	55.15	0.519	0.405	0.377	0.565	0.435	0.255	0.232	0.312	0.202	-0.04156	0.01255	1.08	0.92	1.3	1.08	1.13	0.64	0.95	0.89	1.45	0.93	0.61	1	1.44	0.89	0.85	0.82	0.95	0.66	1.85	0.32	1.2	0.61	1.56	0.63	1.06	0.89	1.6	0.45	1.39
JQ352763	Central Africa	Democratic Republic of the Congo	1995	1995|Democratic Republic of the Congo	0.3747	0.2534	0.4006	0.231	55.15	0.519	0.405	0.376	0.565	0.435	0.255	0.232	0.312	0.202	-0.04155	0.01251	1.08	0.92	1.3	1.08	1.13	0.64	0.95	0.89	1.45	0.93	0.61	1	1.44	0.89	0.85	0.82	0.95	0.66	1.85	0.32	1.2	0.61	1.56	0.63	1.06	0.89	1.6	0.45	1.39
MH733483	Central Africa	Democratic Republic of the Congo	2018	2018|Democratic Republic of the Congo|tumba	0.3734	0.2548	0.398	0.2344	55.45	0.519	0.405	0.38	0.565	0.435	0.254	0.232	0.312	0.202	-0.04141	0.01953	1.09	0.91	1.29	1.1	1.16	0.61	0.96	0.88	1.44	0.93	0.63	1	1.45	0.87	0.85	0.82	0.94	0.66	1.84	0.34	1.15	0.66	1.54	0.66	1.08	0.92	1.53	0.47	1.38
MH733485	Central Africa	Democratic Republic of the Congo	2018	2018|Democratic Republic of the Congo|tumba	0.3734	0.2548	0.398	0.2343	55.43	0.519	0.405	0.38	0.565	0.435	0.254	0.232	0.312	0.202	-0.0417	0.01944	1.09	0.91	1.29	1.1	1.16	0.61	0.96	0.88	1.44	0.94	0.62	1	1.45	0.87	0.85	0.82	0.94	0.66	1.84	0.34	1.15	0.66	1.54	0.66	1.07	0.92	1.53	0.47	1.38
MH733490	Central Africa	Democratic Republic of the Congo	2018	2018|Democratic Republic of the Congo|tumba	0.3734	0.2548	0.3978	0.2342	55.43	0.519	0.405	0.38	0.564	0.436	0.254	0.233	0.311	0.202	-0.04118	0.02041	1.09	0.91	1.29	1.08	1.16	0.61	0.96	0.89	1.44	0.94	0.62	1	1.45	0.87	0.85	0.82	0.94	0.66	1.84	0.34	1.15	0.66	1.54	0.66	1.07	0.93	1.53	0.47	1.38
MH733477	Central Africa	Democratic Republic of the Congo	2018	2018|Democratic Republic of the Congo|tumba	0.3741	0.2543	0.3974	0.2346	55.45	0.519	0.405	0.38	0.565	0.435	0.254	0.232	0.311	0.202	-0.04159	0.01994	1.09	0.91	1.29	1.1	1.16	0.61	0.96	0.88	1.44	0.94	0.62	1	1.45	0.87	0.85	0.82	0.94	0.66	1.84	0.34	1.16	0.66	1.51	0.67	1.07	0.92	1.53	0.47	1.38
KM519951	Central Africa	Democratic Republic of the Congo	2014	2014|Democratic Republic of the Congo	0.3735	0.2554	0.3989	0.2331	55.46	0.519	0.404	0.379	0.565	0.435	0.254	0.233	0.312	0.201	-0.04532	0.01904	1.09	0.91	1.31	1.09	1.14	0.65	0.96	0.86	1.45	0.94	0.61	1	1.41	0.91	0.85	0.83	0.93	0.68	1.82	0.35	1.14	0.64	1.55	0.67	1.06	0.92	1.56	0.46	1.39
MK044560	Central Africa	Democratic Republic of the Congo	2014	2014|Democratic Republic of the Congo	0.3736	0.255	0.3988	0.233	55.44	0.518	0.405	0.379	0.565	0.435	0.254	0.233	0.312	0.202	-0.04461	0.019	1.09	0.91	1.3	1.09	1.13	0.66	0.95	0.86	1.45	0.94	0.61	1	1.41	0.91	0.85	0.83	0.93	0.67	1.81	0.35	1.15	0.63	1.55	0.67	1.06	0.92	1.56	0.46	1.39
KP271020	Central Africa	Democratic Republic of the Congo	2014	2014|Democratic Republic of the Congo	0.3735	0.2554	0.399	0.2329	55.45	0.519	0.404	0.379	0.565	0.435	0.254	0.233	0.312	0.201	-0.0451	0.01881	1.09	0.91	1.31	1.09	1.14	0.65	0.96	0.86	1.44	0.95	0.61	1	1.41	0.91	0.85	0.83	0.94	0.68	1.82	0.35	1.14	0.64	1.55	0.67	1.06	0.91	1.56	0.47	1.39
KC242793	Central Africa	Gabon	1996	1996|Gabon	0.3728	0.2545	0.3989	0.2346	55.57	0.518	0.405	0.38	0.565	0.435	0.254	0.232	0.312	0.202	-0.04458	0.01003	1.1	0.9	1.25	1.13	1.14	0.63	0.98	0.87	1.43	0.96	0.61	1	1.41	0.86	0.86	0.86	0.94	0.68	1.79	0.37	1.14	0.64	1.56	0.66	1.09	0.88	1.54	0.49	1.36
KC242792	Central Africa	Gabon	1994	1994|Gabon	0.3726	0.2543	0.3989	0.2346	55.56	0.518	0.405	0.38	0.565	0.435	0.254	0.232	0.311	0.202	-0.04443	0.00958	1.09	0.91	1.26	1.13	1.14	0.63	0.97	0.87	1.42	0.97	0.61	1	1.4	0.88	0.86	0.86	0.95	0.66	1.8	0.37	1.14	0.64	1.56	0.66	1.1	0.87	1.54	0.49	1.38
KC242794	Central Africa	Gabon	1996	1996|Gabon	0.3723	0.2556	0.3965	0.2359	55.6	0.519	0.405	0.382	0.564	0.436	0.254	0.233	0.311	0.203	-0.04519	0.01301	1.1	0.9	1.24	1.15	1.13	0.63	0.98	0.87	1.43	0.96	0.6	1	1.42	0.89	0.85	0.84	0.93	0.68	1.82	0.35	1.17	0.66	1.51	0.66	1.08	0.89	1.54	0.48	1.36
AF086833	Central Africa	Democratic Republic of the Congo	1976	1976|Democratic Republic of the Congo	0.3736	0.2533	0.4022	0.2318	55.32	0.519	0.404	0.376	0.566	0.434	0.255	0.231	0.312	0.202	-0.04396	0.00233	1.09	0.91	1.28	1.1	1.14	0.64	0.97	0.86	1.45	0.91	0.64	1	1.43	0.88	0.84	0.85	0.91	0.7	1.8	0.37	1.15	0.61	1.58	0.67	1.13	0.83	1.61	0.44	1.35
AY142960	Central Africa	Democratic Republic of the Congo	1976	1976|Democratic Republic of the Congo	0.3736	0.2533	0.4022	0.2317	55.31	0.519	0.404	0.376	0.566	0.434	0.255	0.231	0.312	0.202	-0.04424	0.00227	1.09	0.91	1.28	1.1	1.14	0.64	0.97	0.86	1.46	0.91	0.63	1	1.43	0.88	0.84	0.85	0.91	0.7	1.8	0.37	1.15	0.61	1.58	0.67	1.13	0.82	1.62	0.43	1.35
KC242791	Central Africa	Democratic Republic of the Congo	1977	1977|Democratic Republic of the Congo	0.3734	0.2535	0.4022	0.2317	55.31	0.519	0.404	0.377	0.566	0.434	0.255	0.231	0.312	0.202	-0.04384	0.00229	1.08	0.92	1.28	1.1	1.14	0.64	0.97	0.86	1.46	0.91	0.63	1	1.43	0.88	0.84	0.85	0.91	0.7	1.8	0.37	1.15	0.61	1.58	0.67	1.13	0.82	1.62	0.43	1.35
KM655246	Central Africa	Democratic Republic of the Congo	1976	1976|Democratic Republic of the Congo	0.3736	0.2533	0.4023	0.2318	55.32	0.518	0.404	0.376	0.566	0.434	0.255	0.231	0.312	0.202	-0.04379	0.00225	1.08	0.92	1.29	1.11	1.14	0.63	0.97	0.86	1.45	0.91	0.64	1	1.43	0.88	0.84	0.85	0.91	0.7	1.8	0.37	1.15	0.61	1.58	0.67	1.13	0.83	1.61	0.44	1.35
KY425647	Central Africa	Democratic Republic of the Congo	1976	1976|Democratic Republic of the Congo	0.3734	0.2535	0.4023	0.2322	55.29	0.518	0.404	0.377	0.566	0.434	0.255	0.231	0.312	0.202	-0.04188	0.00422	1.07	0.93	1.29	1.11	1.14	0.63	0.97	0.86	1.46	0.91	0.63	1	1.43	0.88	0.84	0.85	0.9	0.7	1.81	0.37	1.15	0.61	1.58	0.67	1.12	0.83	1.61	0.43	1.35
KY425637	Central Africa	Democratic Republic of the Congo	1976	1976|Democratic Republic of the Congo	0.3729	0.2538	0.4021	0.2319	55.32	0.519	0.404	0.377	0.566	0.434	0.255	0.232	0.312	0.202	-0.04413	0.00255	1.08	0.92	1.28	1.1	1.14	0.65	0.97	0.86	1.46	0.91	0.63	1	1.43	0.88	0.83	0.86	0.92	0.71	1.79	0.37	1.14	0.6	1.59	0.66	1.12	0.83	1.62	0.44	1.35
MH613311	Central Africa	Democratic Republic of the Congo	2017	2017|Democratic Republic of the Congo	0.3742	0.2536	0.402	0.2312	55.32	0.519	0.405	0.376	0.566	0.434	0.255	0.232	0.312	0.201	-0.04568	0.00579	1.08	0.92	1.29	1.13	1.13	0.64	0.96	0.85	1.45	0.92	0.63	1	1.47	0.87	0.86	0.79	0.98	0.64	1.84	0.34	1.14	0.61	1.61	0.64	1.09	0.85	1.62	0.44	1.38
MK088515	Central Africa	Democratic Republic of the Congo	2017	2017|Democratic Republic of the Congo	0.3742	0.2536	0.402	0.2312	55.32	0.519	0.405	0.376	0.566	0.434	0.255	0.232	0.312	0.201	-0.04568	0.00579	1.08	0.92	1.29	1.13	1.13	0.64	0.96	0.85	1.45	0.92	0.63	1	1.47	0.87	0.86	0.79	0.98	0.64	1.84	0.34	1.14	0.61	1.61	0.64	1.09	0.85	1.62	0.44	1.38
MH481611	Central Africa	Democratic Republic of the Congo	2017	2017|Democratic Republic of the Congo	0.3742	0.2536	0.402	0.2312	55.31	0.519	0.405	0.376	0.566	0.434	0.255	0.232	0.312	0.202	-0.04563	0.00631	1.08	0.92	1.3	1.12	1.13	0.64	0.96	0.85	1.45	0.92	0.63	1	1.48	0.88	0.85	0.8	0.98	0.64	1.84	0.34	1.14	0.61	1.61	0.64	1.1	0.85	1.62	0.44	1.37
MK163650	Central Africa	Democratic Republic of the Congo	2018	2018|Democratic Republic of the Congo|Ituri	0.3769	0.2512	0.4011	0.2315	55.17	0.519	0.404	0.375	0.566	0.434	0.255	0.231	0.312	0.201	-0.04849	-0.02062	1.11	0.89	1.26	1.13	1.14	0.64	0.97	0.87	1.41	0.99	0.6	1	1.42	0.89	0.87	0.82	0.96	0.64	1.82	0.34	1.12	0.63	1.6	0.64	1.16	0.78	1.59	0.47	1.38
MK731989	Central Africa	Democratic Republic of the Congo	2018	2018|Democratic Republic of the Congo|Ituri	0.3769	0.2512	0.4011	0.2315	55.17	0.519	0.404	0.375	0.566	0.434	0.255	0.231	0.312	0.201	-0.04849	-0.02062	1.11	0.89	1.26	1.13	1.14	0.64	0.97	0.87	1.41	0.99	0.6	1	1.42	0.89	0.87	0.82	0.96	0.64	1.82	0.34	1.12	0.63	1.6	0.64	1.16	0.78	1.59	0.47	1.38
MK731985	Central Africa	Democratic Republic of the Congo	2018	2018|Democratic Republic of the Congo|Ituri	0.3769	0.2512	0.4011	0.2315	55.17	0.519	0.404	0.375	0.566	0.434	0.255	0.231	0.312	0.201	-0.04849	-0.02062	1.11	0.89	1.26	1.13	1.14	0.64	0.97	0.87	1.41	0.99	0.6	1	1.42	0.89	0.87	0.82	0.96	0.64	1.82	0.34	1.12	0.63	1.6	0.64	1.16	0.78	1.59	0.47	1.38
MK007331	Central Africa	Democratic Republic of the Congo	2018	2018|Democratic Republic of the Congo|Ituri	0.3769	0.2512	0.4011	0.2315	55.17	0.519	0.404	0.375	0.566	0.434	0.255	0.231	0.312	0.201	-0.04849	-0.02062	1.11	0.89	1.26	1.13	1.14	0.64	0.97	0.87	1.41	0.99	0.6	1	1.42	0.89	0.87	0.82	0.96	0.64	1.82	0.34	1.12	0.63	1.6	0.64	1.16	0.78	1.59	0.47	1.38
MK163652	Central Africa	Democratic Republic of the Congo	2018	2018|Democratic Republic of the Congo|Ituri	0.3767	0.2515	0.4011	0.2315	55.17	0.519	0.404	0.375	0.566	0.434	0.255	0.231	0.312	0.201	-0.04845	-0.0195	1.11	0.89	1.26	1.13	1.14	0.64	0.97	0.87	1.41	0.99	0.6	1	1.42	0.89	0.87	0.82	0.96	0.64	1.82	0.34	1.12	0.63	1.6	0.64	1.15	0.79	1.59	0.47	1.38
MK163669	Central Africa	Democratic Republic of the Congo	2018	2018|Democratic Republic of the Congo|Ituri	0.3768	0.2513	0.4014	0.2312	55.17	0.519	0.404	0.374	0.566	0.434	0.255	0.231	0.312	0.201	-0.04893	-0.02085	1.11	0.89	1.26	1.13	1.14	0.64	0.98	0.86	1.41	0.99	0.6	1	1.42	0.89	0.87	0.82	0.96	0.64	1.82	0.34	1.12	0.63	1.6	0.64	1.16	0.78	1.59	0.47	1.38
MK007339	Central Africa	Democratic Republic of the Congo	2018	2018|Democratic Republic of the Congo|Ituri	0.377	0.2513	0.4008	0.2317	55.18	0.519	0.404	0.375	0.566	0.434	0.255	0.231	0.312	0.201	-0.04842	-0.02187	1.11	0.89	1.26	1.13	1.14	0.64	0.97	0.87	1.41	0.99	0.6	1	1.42	0.89	0.87	0.82	0.96	0.64	1.82	0.34	1.12	0.63	1.6	0.64	1.17	0.78	1.58	0.48	1.38
MK007340	Central Africa	Democratic Republic of the Congo	2018	2018|Democratic Republic of the Congo|Ituri	0.3764	0.2517	0.4011	0.2315	55.19	0.519	0.404	0.375	0.566	0.434	0.255	0.231	0.312	0.201	-0.04827	-0.01975	1.11	0.89	1.26	1.13	1.14	0.64	0.97	0.87	1.41	0.99	0.6	1	1.42	0.89	0.87	0.82	0.96	0.64	1.82	0.34	1.12	0.63	1.6	0.64	1.16	0.78	1.59	0.47	1.38
MK007344	Central Africa	Democratic Republic of the Congo	2018	2018|Democratic Republic of the Congo|Ituri	0.3769	0.2512	0.4011	0.2315	55.16	0.519	0.404	0.375	0.566	0.434	0.255	0.231	0.312	0.201	-0.0487	-0.02075	1.11	0.89	1.26	1.13	1.14	0.64	0.97	0.87	1.41	0.99	0.6	1	1.42	0.89	0.87	0.82	0.96	0.64	1.82	0.34	1.12	0.63	1.6	0.64	1.16	0.78	1.6	0.47	1.38
MK163663	Central Africa	Democratic Republic of the Congo	2018	2018|Democratic Republic of the Congo|Ituri	0.3767	0.2515	0.4013	0.2312	55.19	0.519	0.404	0.375	0.566	0.434	0.255	0.231	0.312	0.201	-0.04739	-0.01818	1.11	0.89	1.27	1.11	1.14	0.64	0.97	0.87	1.41	0.99	0.6	1	1.42	0.89	0.87	0.82	0.96	0.64	1.82	0.34	1.12	0.63	1.6	0.64	1.16	0.78	1.59	0.47	1.38
MK007335	Central Africa	Democratic Republic of the Congo	2018	2018|Democratic Republic of the Congo|Ituri	0.3767	0.2512	0.4011	0.2318	55.18	0.519	0.404	0.375	0.566	0.434	0.255	0.231	0.312	0.202	-0.04746	-0.02021	1.11	0.89	1.26	1.13	1.14	0.64	0.97	0.87	1.41	0.99	0.6	1	1.42	0.89	0.87	0.82	0.96	0.64	1.83	0.34	1.12	0.63	1.6	0.64	1.16	0.78	1.6	0.46	1.37
KC242785	Central Africa	Democratic Republic of the Congo	2007	2007|Democratic Republic of the Congo	0.3734	0.2526	0.4019	0.2323	55.48	0.518	0.405	0.377	0.566	0.434	0.255	0.231	0.312	0.202	-0.03493	0.00981	1.06	0.94	1.34	1.11	1.13	0.64	0.96	0.82	1.47	0.9	0.63	1	1.37	0.92	0.89	0.83	0.94	0.67	1.86	0.33	1.15	0.65	1.51	0.69	1.11	0.85	1.58	0.46	1.39
KC242788	Central Africa	Democratic Republic of the Congo	2007	2007|Democratic Republic of the Congo	0.3737	0.2524	0.4019	0.2323	55.46	0.517	0.405	0.376	0.566	0.434	0.255	0.231	0.312	0.202	-0.03516	0.01015	1.06	0.94	1.34	1.11	1.13	0.64	0.96	0.82	1.45	0.91	0.64	1	1.39	0.91	0.88	0.83	0.94	0.67	1.86	0.33	1.16	0.63	1.51	0.69	1.11	0.84	1.59	0.46	1.39
HQ613403	Central Africa	Democratic Republic of the Congo	2007	2007|Democratic Republic of the Congo	0.3734	0.2526	0.402	0.2323	55.47	0.517	0.405	0.377	0.566	0.434	0.255	0.231	0.312	0.202	-0.03474	0.00978	1.06	0.94	1.34	1.11	1.12	0.64	0.97	0.82	1.46	0.91	0.63	1	1.38	0.9	0.89	0.83	0.94	0.67	1.86	0.33	1.15	0.65	1.51	0.69	1.11	0.84	1.59	0.46	1.39
HQ613402	Central Africa	Democratic Republic of the Congo	2008	2008|Democratic Republic of the Congo	0.3726	0.2533	0.4018	0.2322	55.49	0.517	0.405	0.377	0.565	0.435	0.254	0.231	0.312	0.202	-0.03292	0.01064	1.06	0.94	1.34	1.11	1.13	0.64	0.96	0.82	1.46	0.91	0.63	1	1.38	0.9	0.89	0.83	0.94	0.67	1.86	0.33	1.15	0.65	1.51	0.69	1.1	0.86	1.59	0.46	1.39
KY471124	Central Africa	Gabon	2001	2001|Gabon	0.378	0.2508	0.3961	0.2358	55.42	0.52	0.404	0.377	0.565	0.435	0.256	0.231	0.31	0.203	-0.02775	-0.02416	1.02	0.98	1.22	1.19	1.18	0.58	0.96	0.87	1.45	0.92	0.63	1	1.41	0.93	0.8	0.86	0.91	0.73	1.8	0.37	1.15	0.7	1.54	0.61	1.2	0.77	1.52	0.5	1.32
KC242800	Central Africa	Gabon	2002	2001|Gabon	0.378	0.2508	0.3964	0.2356	55.43	0.521	0.404	0.377	0.565	0.435	0.255	0.231	0.31	0.203	-0.02736	-0.02457	1.02	0.98	1.22	1.18	1.18	0.58	0.96	0.88	1.45	0.91	0.64	1	1.41	0.93	0.79	0.87	0.91	0.73	1.8	0.37	1.15	0.7	1.54	0.61	1.21	0.77	1.52	0.5	1.32
KF113528	Central Africa	Republic of Congo	2003	2003|Republic of Congo	0.3745	0.2525	0.3966	0.2376	55.56	0.52	0.405	0.38	0.564	0.436	0.255	0.232	0.31	0.204	-0.0262	-0.01991	1.03	0.97	1.24	1.18	1.17	0.58	0.97	0.85	1.43	0.92	0.65	1	1.39	0.94	0.78	0.89	0.87	0.74	1.79	0.42	1.12	0.69	1.57	0.61	1.18	0.8	1.52	0.49	1.33
KF113529	Central Africa	Republic of Congo	2003	2003|Republic of Congo	0.3751	0.2525	0.3967	0.2367	55.55	0.52	0.406	0.379	0.564	0.436	0.255	0.232	0.31	0.203	-0.02837	-0.02054	1.03	0.97	1.24	1.18	1.17	0.58	0.97	0.85	1.43	0.92	0.65	1	1.38	0.94	0.79	0.89	0.89	0.74	1.79	0.39	1.12	0.69	1.57	0.61	1.2	0.79	1.52	0.49	1.33
[truncated: 161 more columns]

## Sheet: host
Scientific name	Common name	RefSeq
Panthera pardus	Leopard	GCF_001857705.1
Acinonyx jubatus	Cheetah	GCF_001443585.1
Vulpes vulpes	Red fox	GCF_003160815.1
Hipposideros armiger	Great roundleaf bat	GCF_001890085.1
Rhinolophus sinicus	Chinese rufous horseshoe bat	GCF_001888835.1
Pteropus vampyrus	Large flying fox	GCF_000151845.2
Pteropus alecto	Black flying fox	GCF_000325575.1
Rousettus aegyptiacus	Egyptian rousette	GCF_001466805.2
Desmodus rotundus	Common vampire bat	GCF_002940915.2
Eptesicus fuscus	Big brown bat	GCF_000308155.1
Myotis brandtii	Brandt's bat	GCF_000412655.1
Myotis lucifugus	Little brown bat	GCF_000147115.1
Myotis davidii	David's myotis	GCF_000327345.1
Miniopterus natalensis	Natal long-fingered bat	GCF_001595765.1
Oryctolagus cuniculus	Rabbit	GCF_000003625.3
Heterocephalus glaber	Naked mole-rat	GCF_000247695.1
Fukomys damarensis	Damara mole-rat	GCF_000743615.1
Cavia porcellus	Guinea pig	GCF_000151735.1
Octodon degus	Degu	GCF_000260255.1
Chinchilla lanigera	Long-tailed chinchilla	GCF_000276665.1
Rattus norvegicus	Norway rat	GCF_000001895.5
Mus musculus	House mouse	GCF_000001635.26
Mus caroli	Ryukyu mouse	GCF_900094665.1
Mus pahari	Shrew mouse	GCF_900095145.1
Meriones unguiculatus	Mongolian gerbil	GCF_002204375.1
Mesocricetus auratus	Golden hamster	GCF_000349665.1
Cricetulus griseus	Chinese hamster	GCF_000223135.1
Microtus ochrogaster	Prairie vole	GCF_000317375.1
Peromyscus maniculatus bairdii	Prairie deer mouse	GCF_000500345.1
Nannospalax galili	Upper Galilee mountains blind mole rat	GCF_000622305.1
Jaculus jaculus	Lesser Egyptian jerboa	GCF_000280705.1
Dipodomys ordii	Ord's kangaroo rat	GCF_000151885.1
Urocitellus parryii	Arctic ground squirrel	GCF_003426925.1
Ictidomys tridecemlineatus	Thirteen-lined ground squirrel	GCF_000236235.1
Otolemur garnettii	Small-eared galago	GCF_000181295.1
Propithecus coquereli	Coquerel's sifaka	GCF_000956105.1
Microcebus murinus	Gray mouse lemur	GCF_000165445.2
Callithrix jacchus	White-tufted-ear marmoset	GCF_000004665.1
Aotus nancymaae	Ma's night monkey	GCF_000952055.2
Saimiri boliviensis boliviensis	Bolivian squirrel monkey	GCF_000235385.1
Cebus capucinus imitator	White-faced sapajou	GCF_001604975.1
Mandrillus leucophaeus	Drill	GCF_000951045.1
Cercocebus atys	Sooty mangabey	GCF_000955945.1
Papio anubis	Olive baboon	GCF_000264685.3
Theropithecus gelada	Gelada	GCF_003255815.1
Macaca mulatta	Rhesus monkey	GCF_000772875.2
Macaca fascicularis	Crab-eating macaque	GCF_000364345.1
Macaca nemestrina	Pig-tailed macaque	GCF_000956065.1
Chlorocebus sabaeus	Green monkey	GCF_000409795.2
Rhinopithecus roxellana	Golden snub-nosed monkey	GCF_000769185.1
Rhinopithecus bieti	Black snub-nosed monkey	GCF_001698545.1
Piliocolobus tephrosceles	Ugandan red Colobus	GCF_002776525.3
Colobus angolensis palliatus	Angola colobus	GCF_000951035.1
Nomascus leucogenys	Northern white-cheeked gibbon	GCF_000146795.2
Gorilla gorilla gorilla	Gorilla	GCF_000151905.2
Pan troglodytes	Chimpanzee	GCF_002880755.1
Pan paniscus	Pygmy chimpanzee	GCF_000258655.2
Homo sapiens	Human	GCF_000001405.38
Pongo abelii	Sumatran orangutan	GCF_002880775.1
Carlito syrichta	Philippine tarsier	GCF_000164805.1
Galeopterus variegatus	Sunda flying lemur	GCF_000696425.1
Loxodonta africana	African savanna elephant	GCF_000001905.1
Orycteropus afer afer	Aardvark	GCF_000298275.1
