# Supplementary material for: Host Adaptation and Evolutionary Analysis of Zaire ebolavirus: Insights From Codon Usage Based Investigations
Source: Front Microbiol. 2020 Nov 5;11:570131. doi: 10.3389/fmicb.2020.570131 (PMC7674656; doi:10.3389/fmicb.2020.570131)
Supplement: Supplementary Table 2 — Correlation analysis (Spearman’s rank correlation) of the base compositional features and codon usage indices of EBOV. [file Table_2.docx]

**Supplementary Table 2. Correlation analysis (Spearman’s rank correlation) of the base compositional features and codon usage indices of EBOV**

|  | U | C | A | G | U3s | C3s | A3s | G3s | AU | GC | GC12 | GC3 | ENC | Axis1 (RSCU) |
| --- | --- | --- | --- | --- | --- | --- | --- | --- | --- | --- | --- | --- | --- | --- |
| C | -.295** |  |  |  |  |  |  |  |  |  |  |  |  |  |
| A | .064 | -.360** |  |  |  |  |  |  |  |  |  |  |  |  |
| G | -.060 | .402** | -.875** |  |  |  |  |  |  |  |  |  |  |  |
| U3s | .616** | -.368** | .344** | -.401** |  |  |  |  |  |  |  |  |  |  |
| C3s | -.611** | .531** | -.277** | .305** | -.770** |  |  |  |  |  |  |  |  |  |
| A3s | -.006 | -.318** | .578** | -.570** | .109 | -.263** |  |  |  |  |  |  |  |  |
| G3s | .051 | .160** | -.587** | .598** | -.127* | .063 | -.718** |  |  |  |  |  |  |  |
| AU | .336** | -.449** | .562** | -.625** | .483** | -.473** | .604** | -.469** |  |  |  |  |  |  |
| GC | -.336** | .449** | -.562** | .625** | -.483** | .473** | -.604** | .469** | -1.000** |  |  |  |  |  |
| GC12 | .018 | .183** | -.062 | .004 | .133* | -.092 | -.075 | -.027 | -.166** | .166** |  |  |  |  |
| GC3 | -.443** | .482** | -.535** | .580** | -.697** | .730** | -.574** | .430** | -.636** | .636** | -.056 |  |  |  |
| ENC | -.409** | .324** | -.478** | .569** | -.547** | .535** | -.530** | .427** | -.629** | .629** | -.052 | .681** |  |  |
| Axis1 | -.076 | .260** | -.475** | .512** | -.373** | .335** | -.323** | .326** | -.352** | .352** | -.168** | .436** | .452** |  |
| Axis2 | -.075 | .193** | .248** | -.223** | .039 | -.039 | .103 | -.132* | .104 | -.104 | .080 | -.044 | -.089 | -.215** |

** Correlation is significant at the 1% level of significance; * Correlation is significant at the 5% level of significance.
